# Supplementary material
Source: ML conference proceedings conference paper supplement (https://openreview.net/forum?id=zmlhP8myaT)

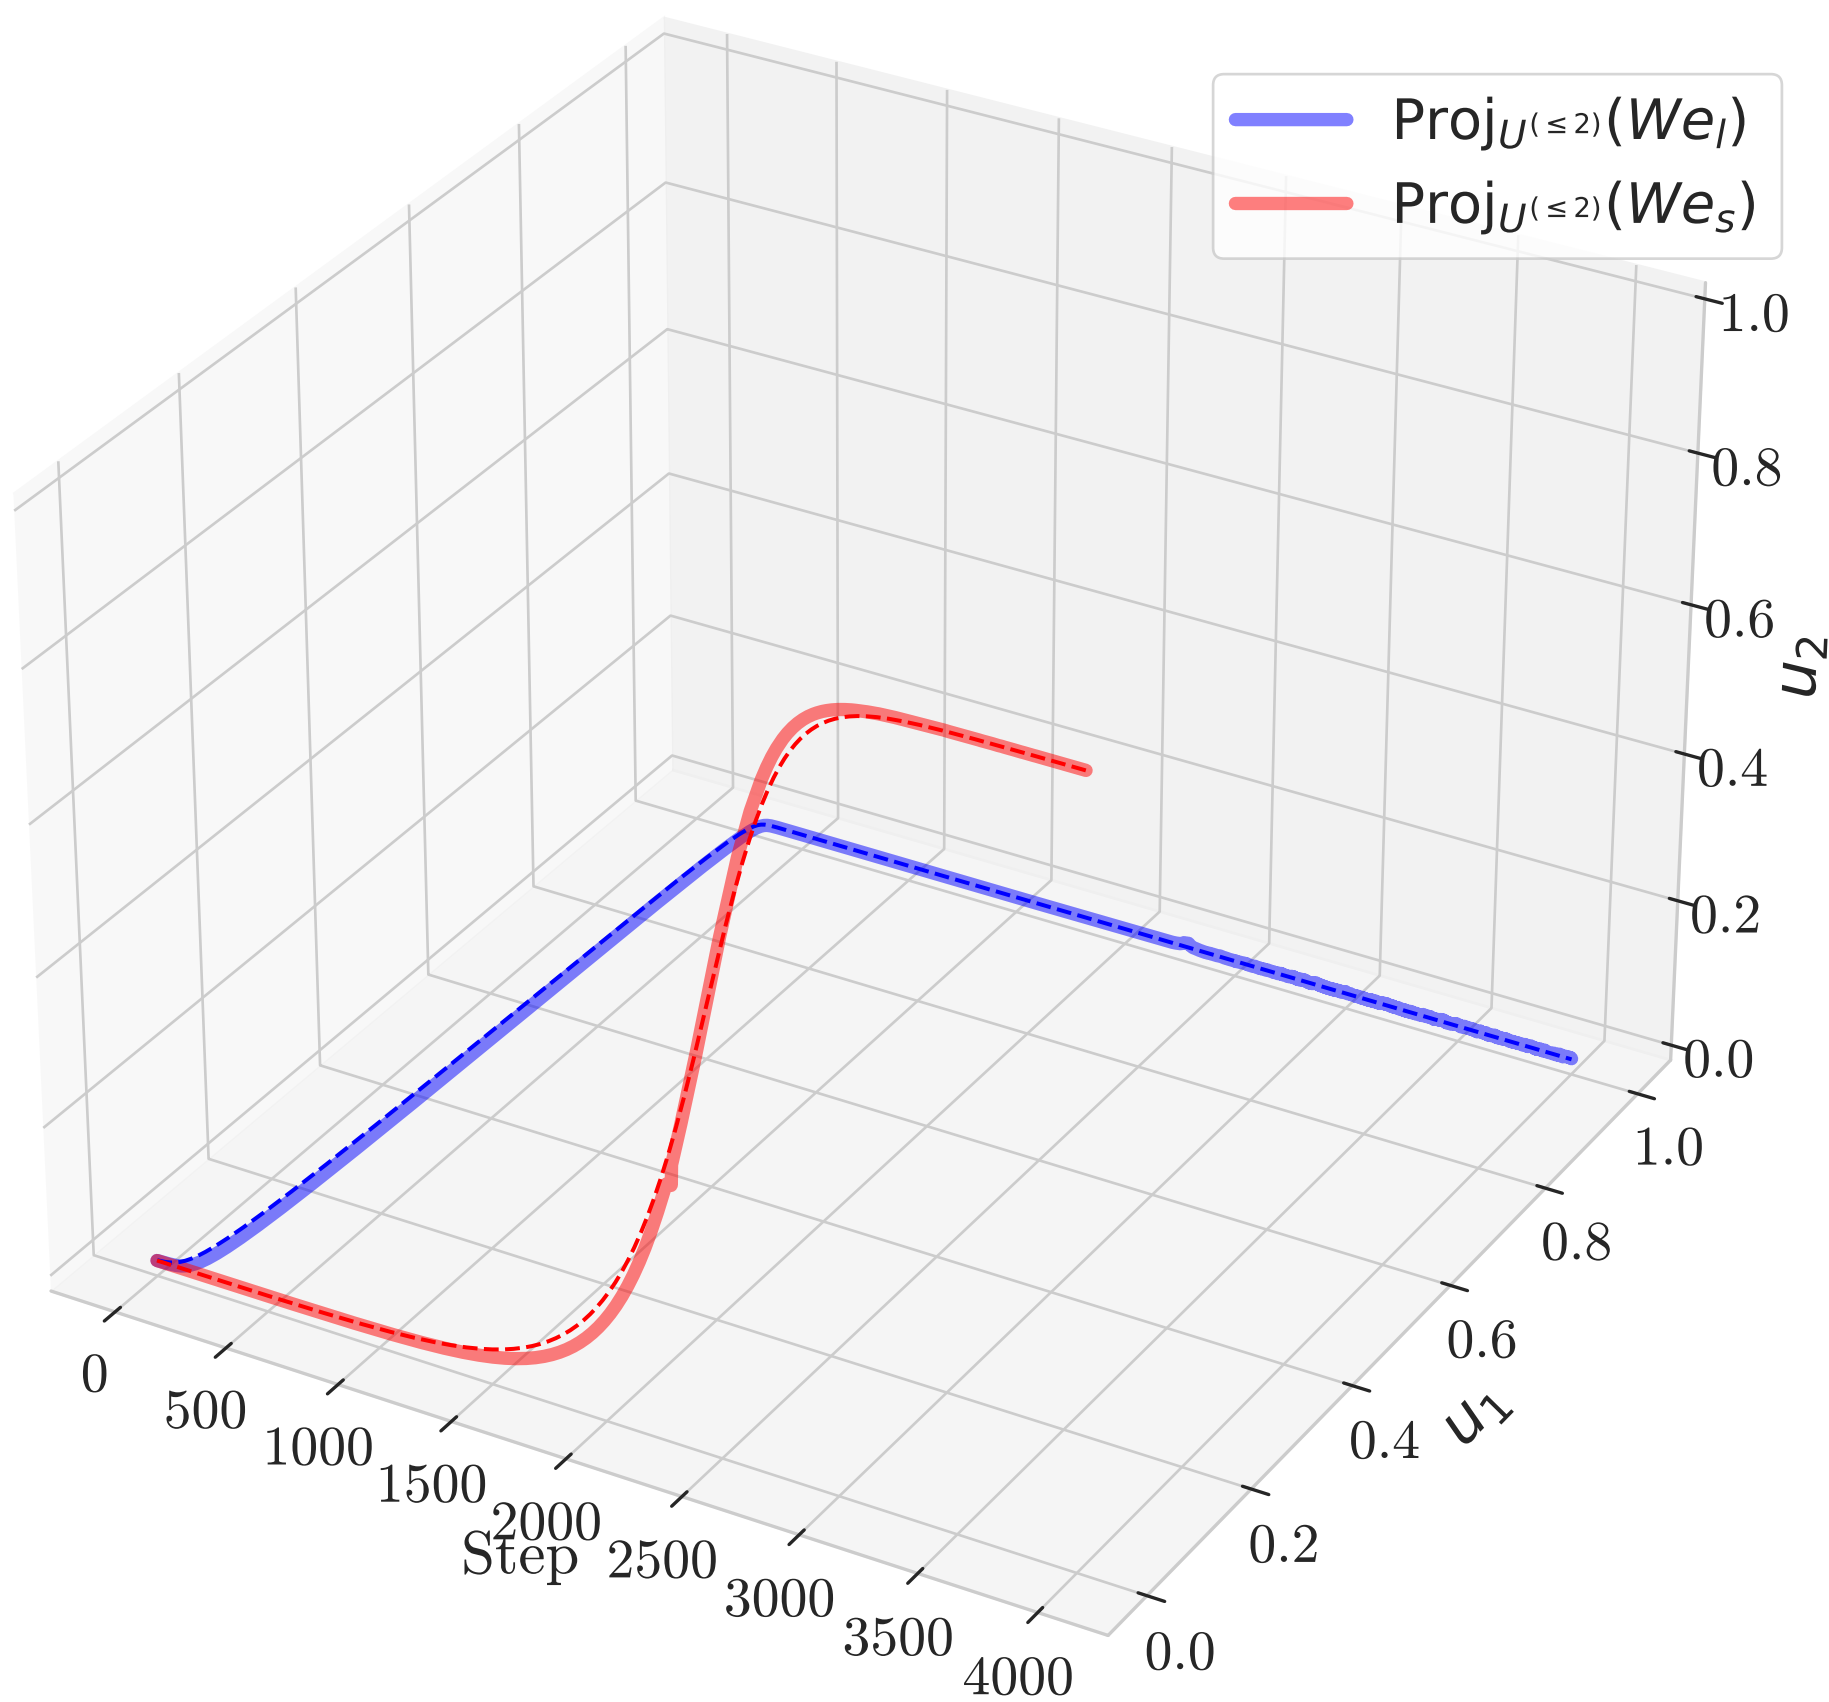

Supplement: supplementary_material [file dim_3d.pdf › feature_preference/linear/figure/dim_3d.pdf]

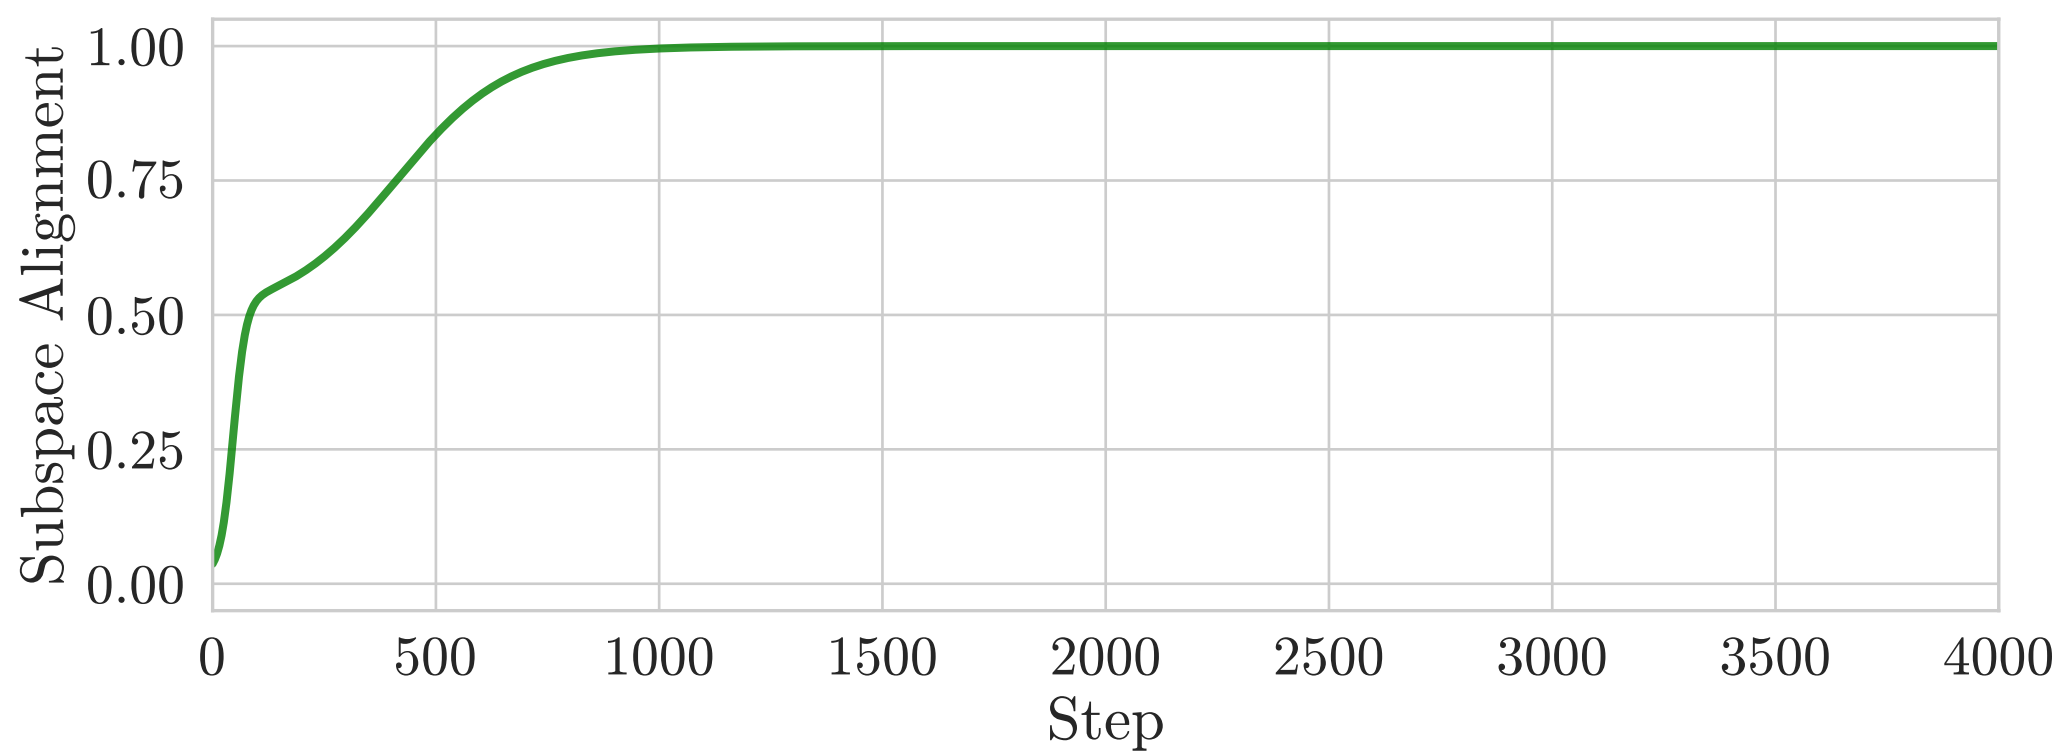

Supplement: supplementary_material [file dim_alignment.pdf › feature_preference/linear/figure/dim_alignment.pdf]

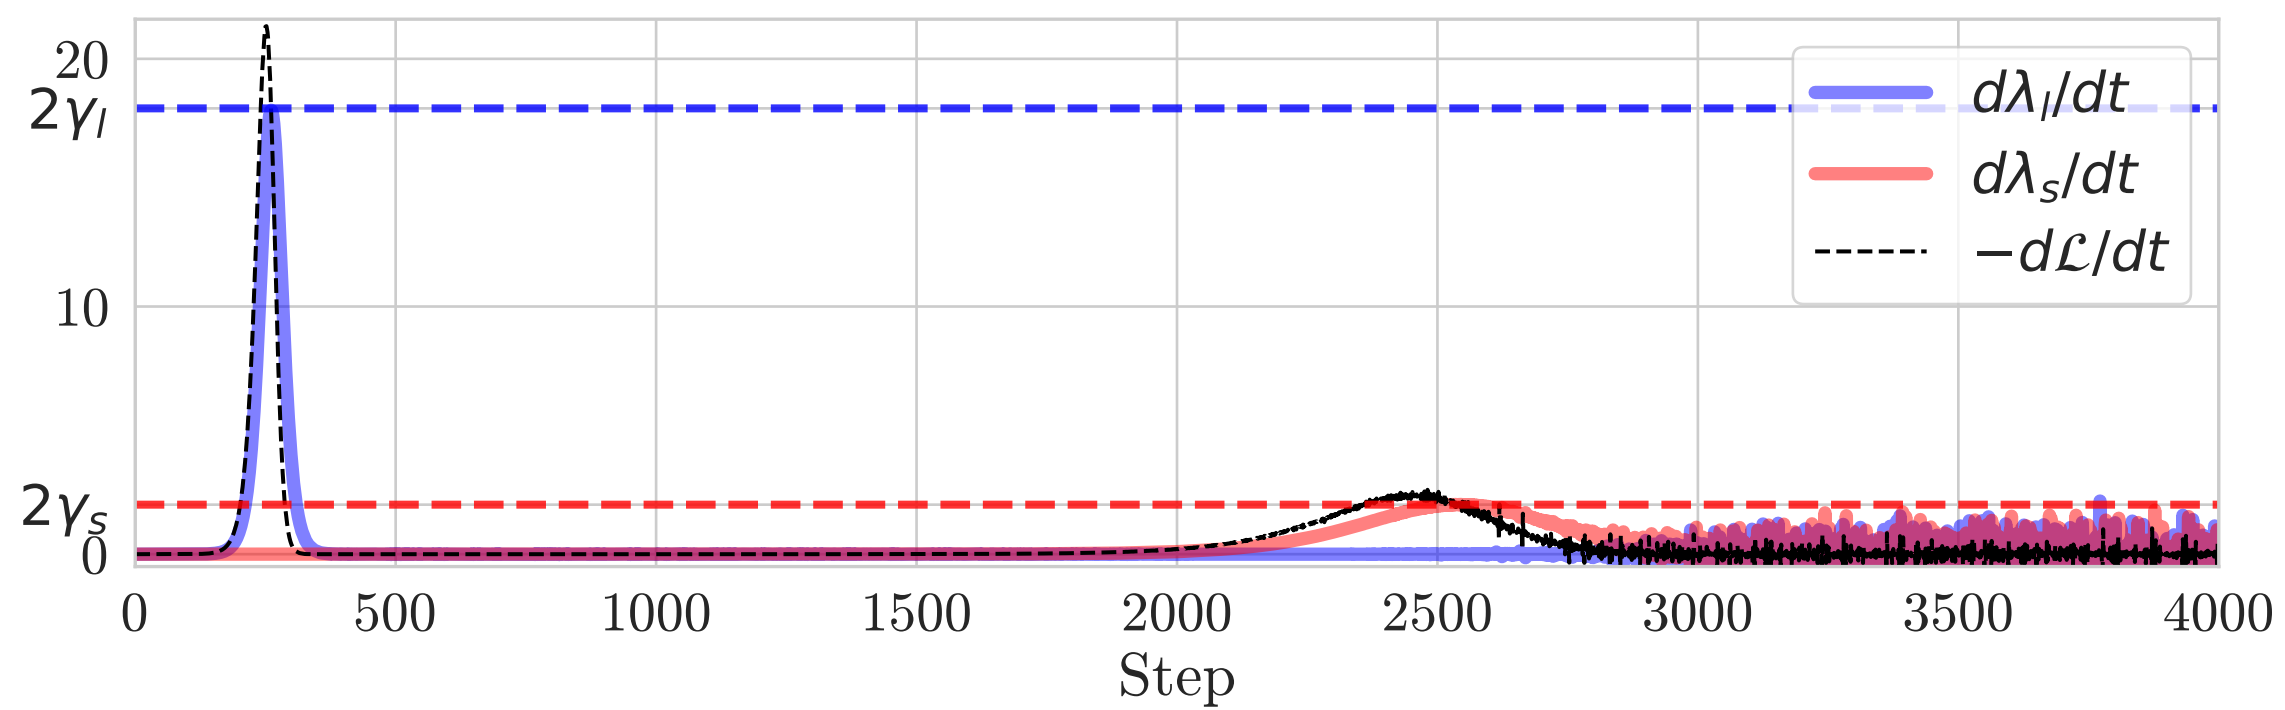

Supplement: supplementary_material [file dim_dcdt_dldt.pdf › feature_preference/linear/figure/dim_dcdt_dldt.pdf]

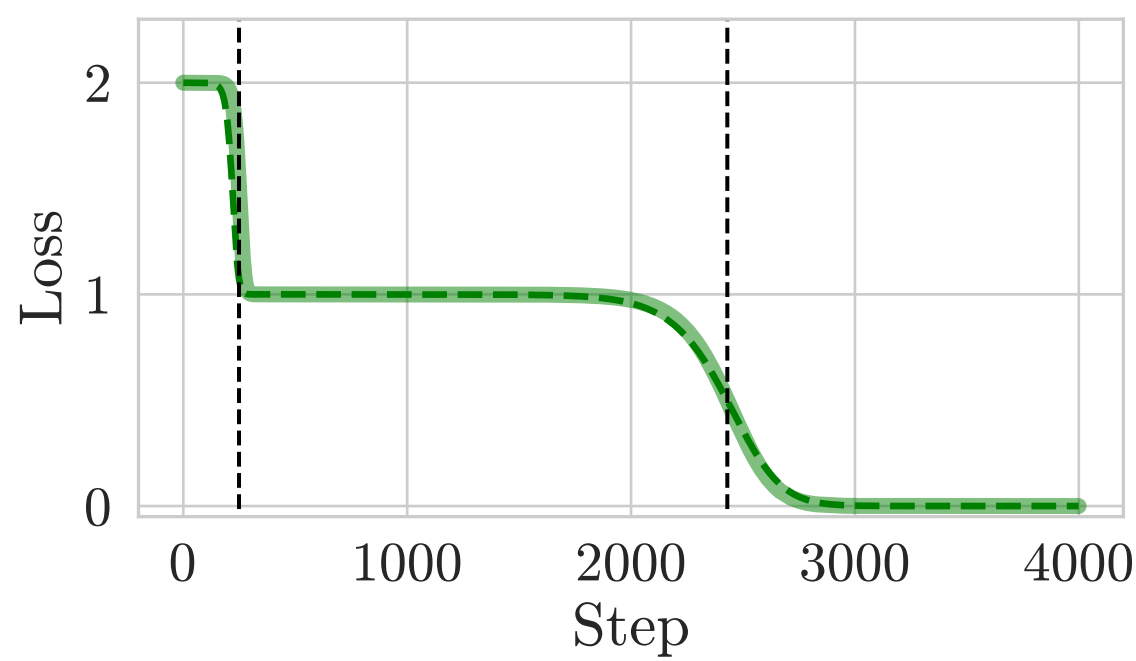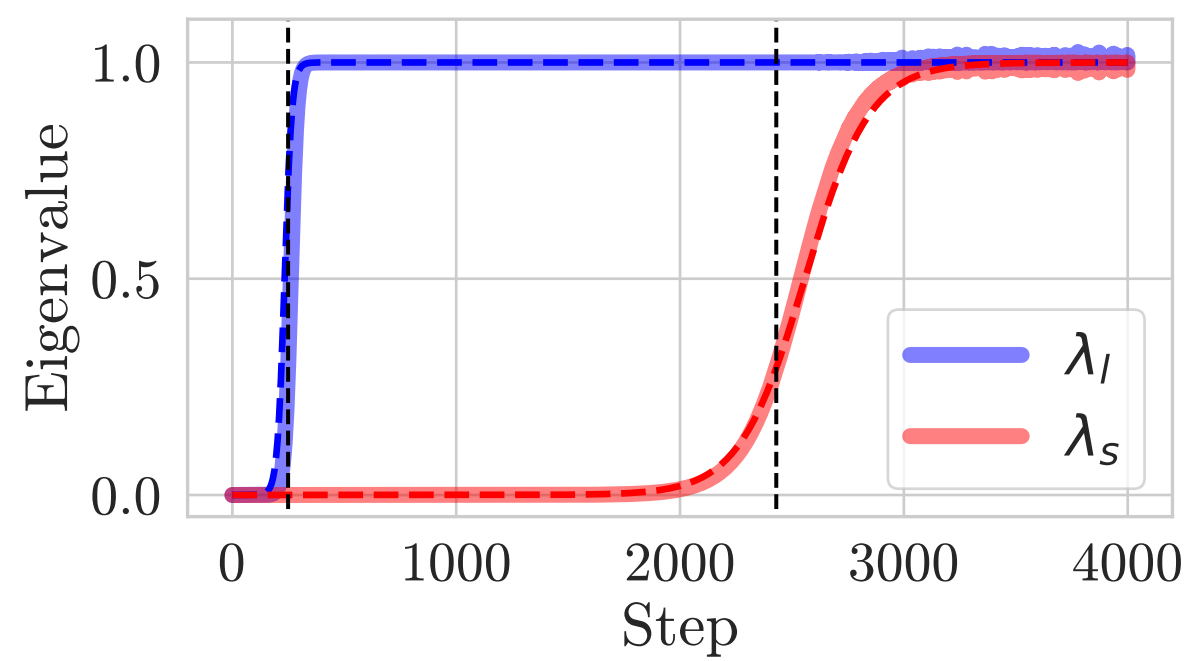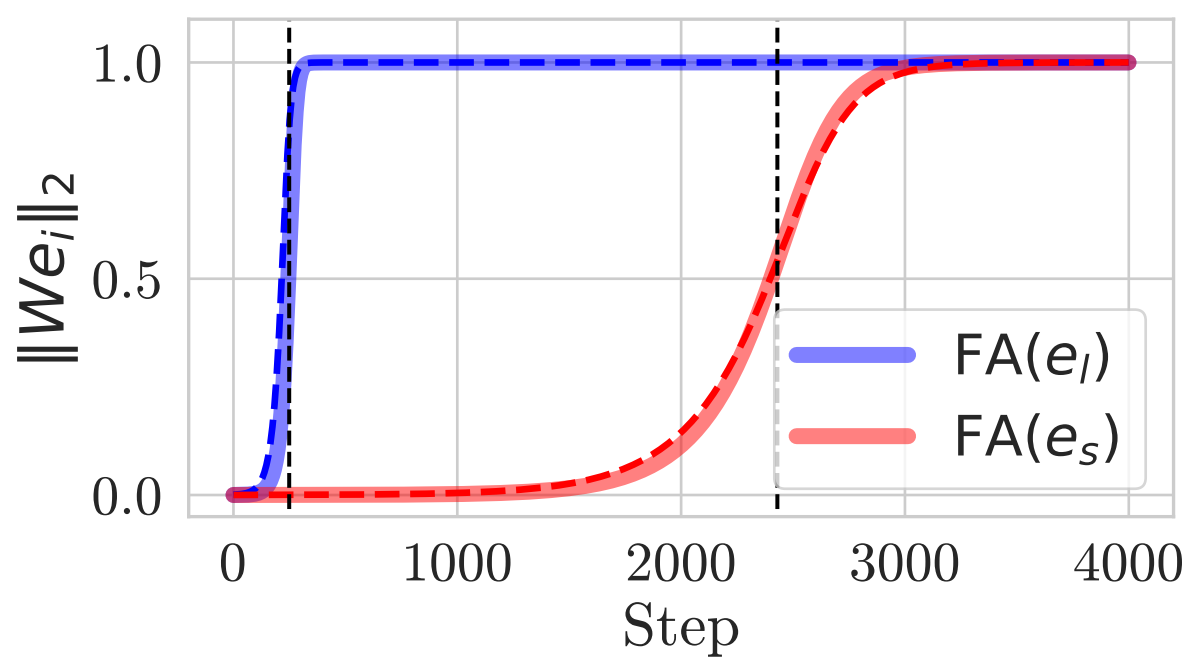

Supplement: supplementary_material [file dim_loss_eig_align.pdf › feature_preference/linear/figure/dim_loss_eig_align.pdf]

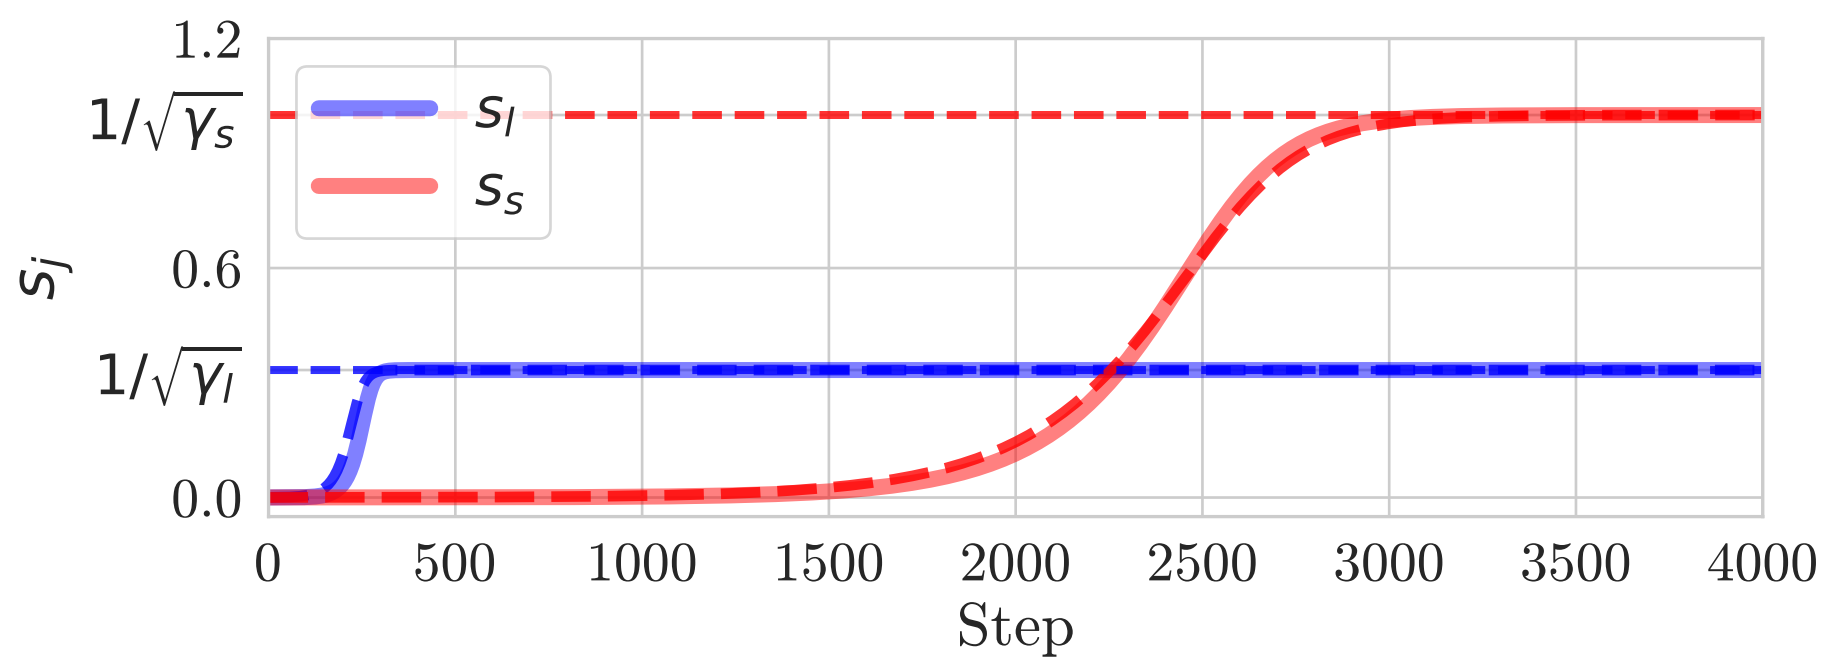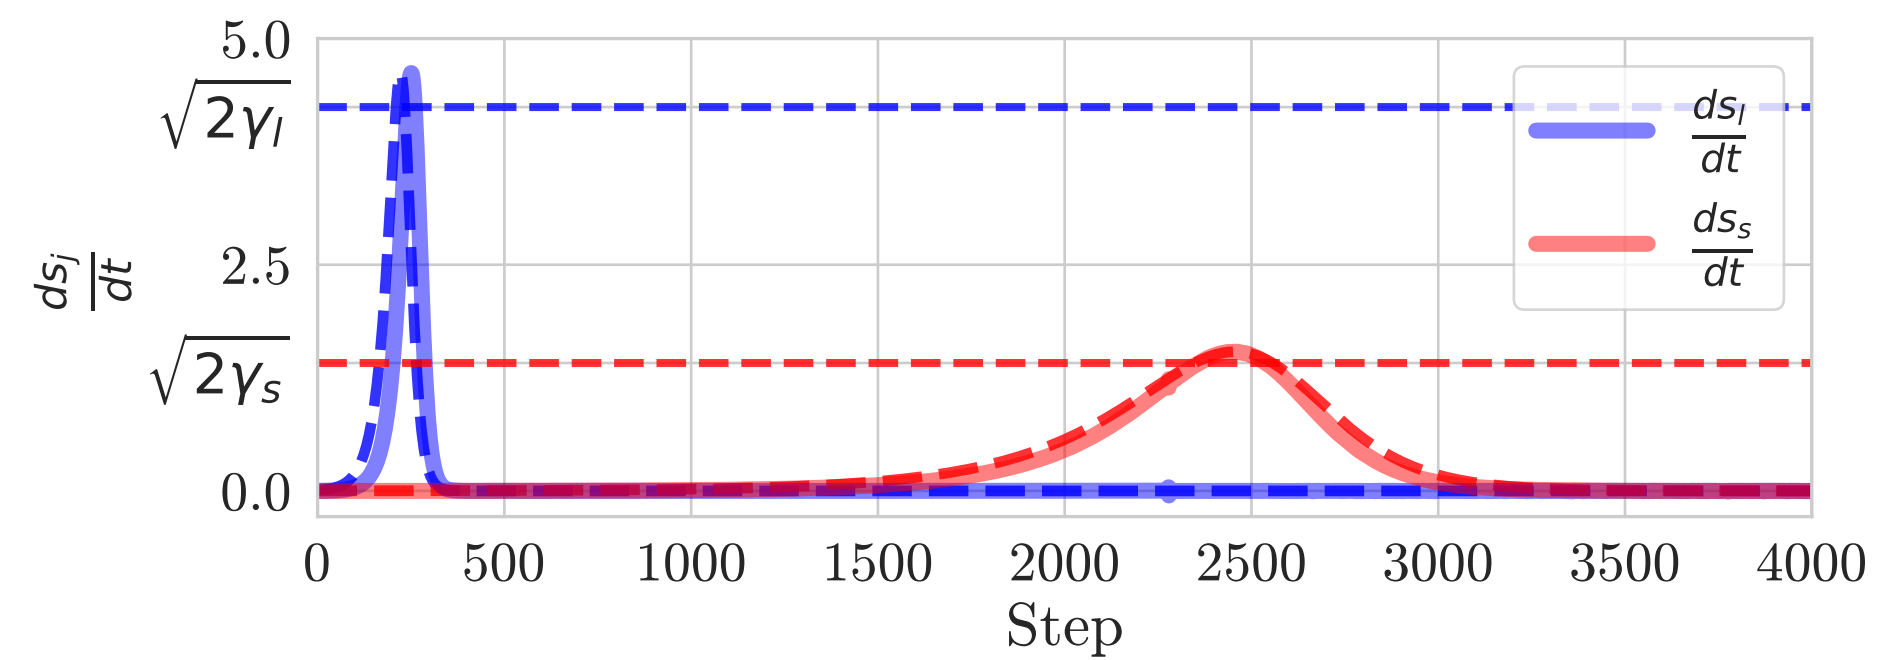

Supplement: supplementary_material [file dim_s_ds_dt.pdf › feature_preference/linear/figure/dim_s_ds_dt.pdf]

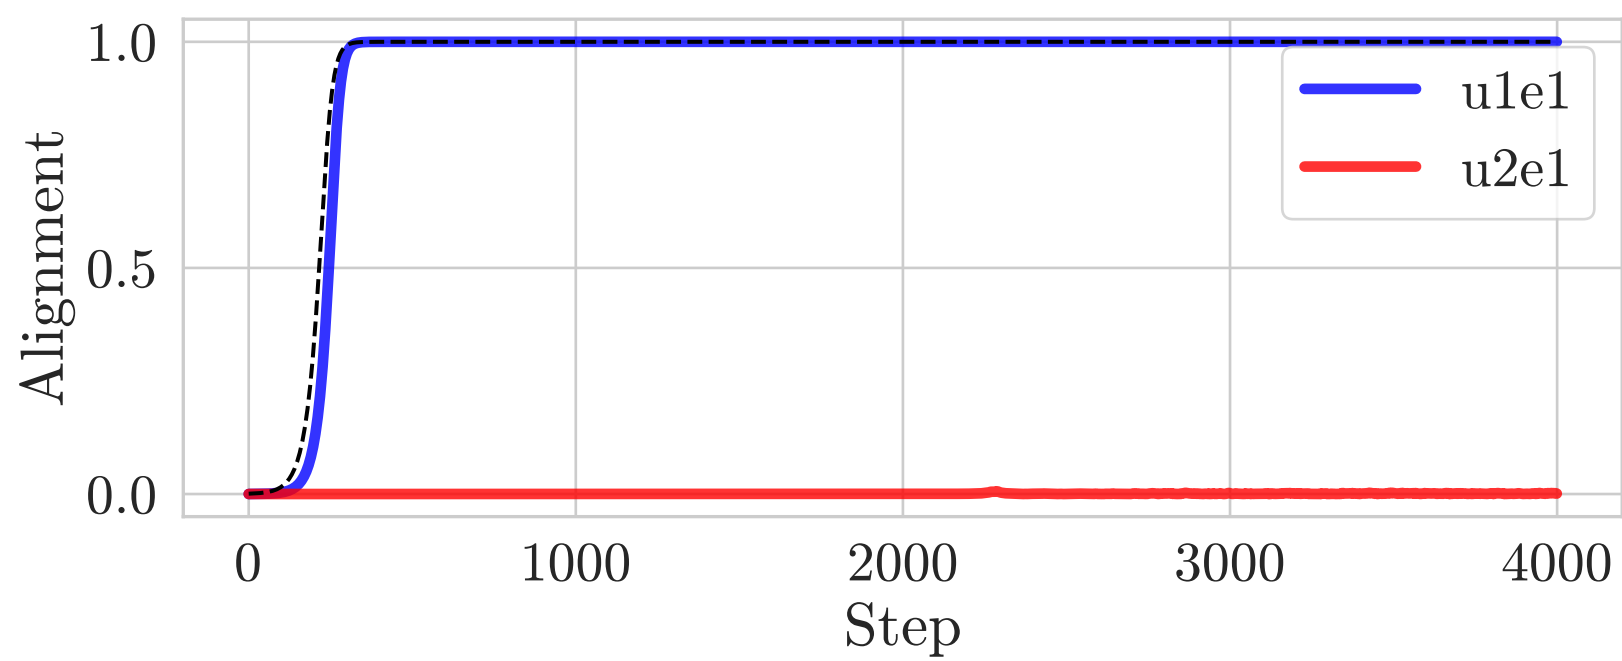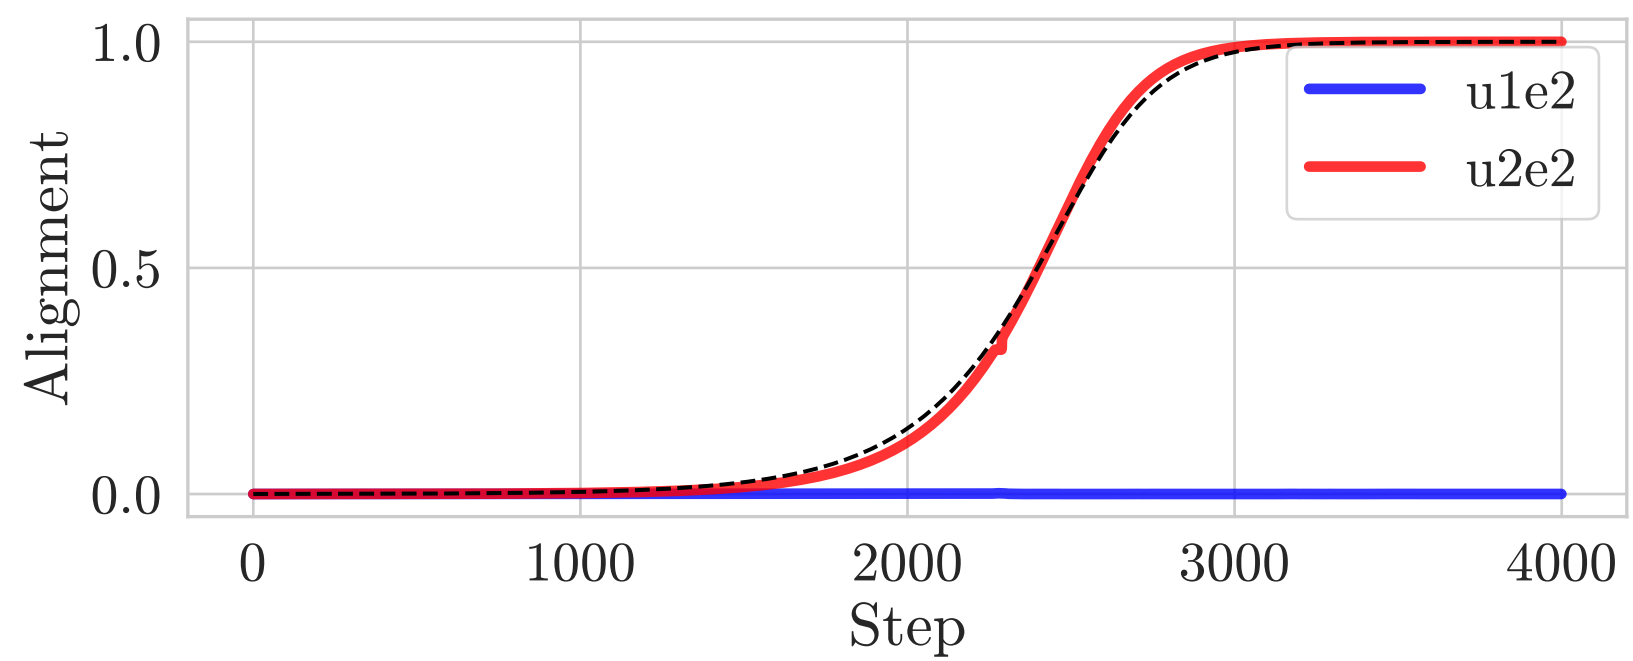

Supplement: supplementary_material [file dim_ue.pdf › feature_preference/linear/figure/dim_ue.pdf]

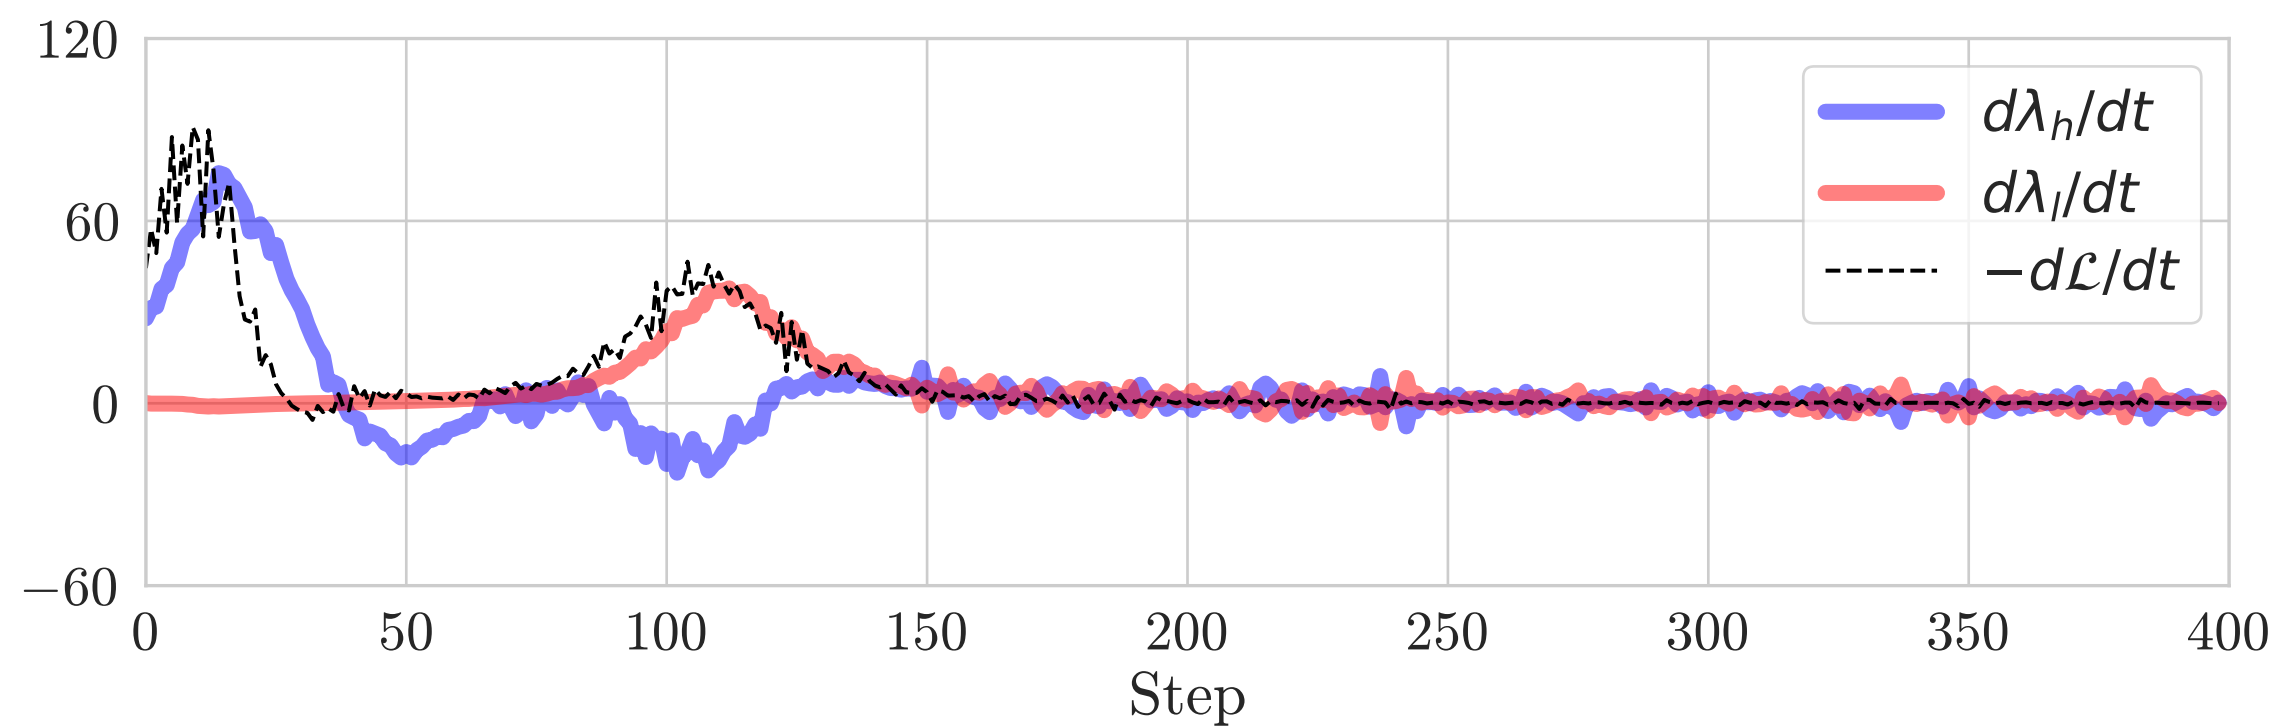

Supplement: supplementary_material [file dim_dcdt_dldt.pdf › feature_preference/non_linear/figure/dim_dcdt_dldt.pdf]

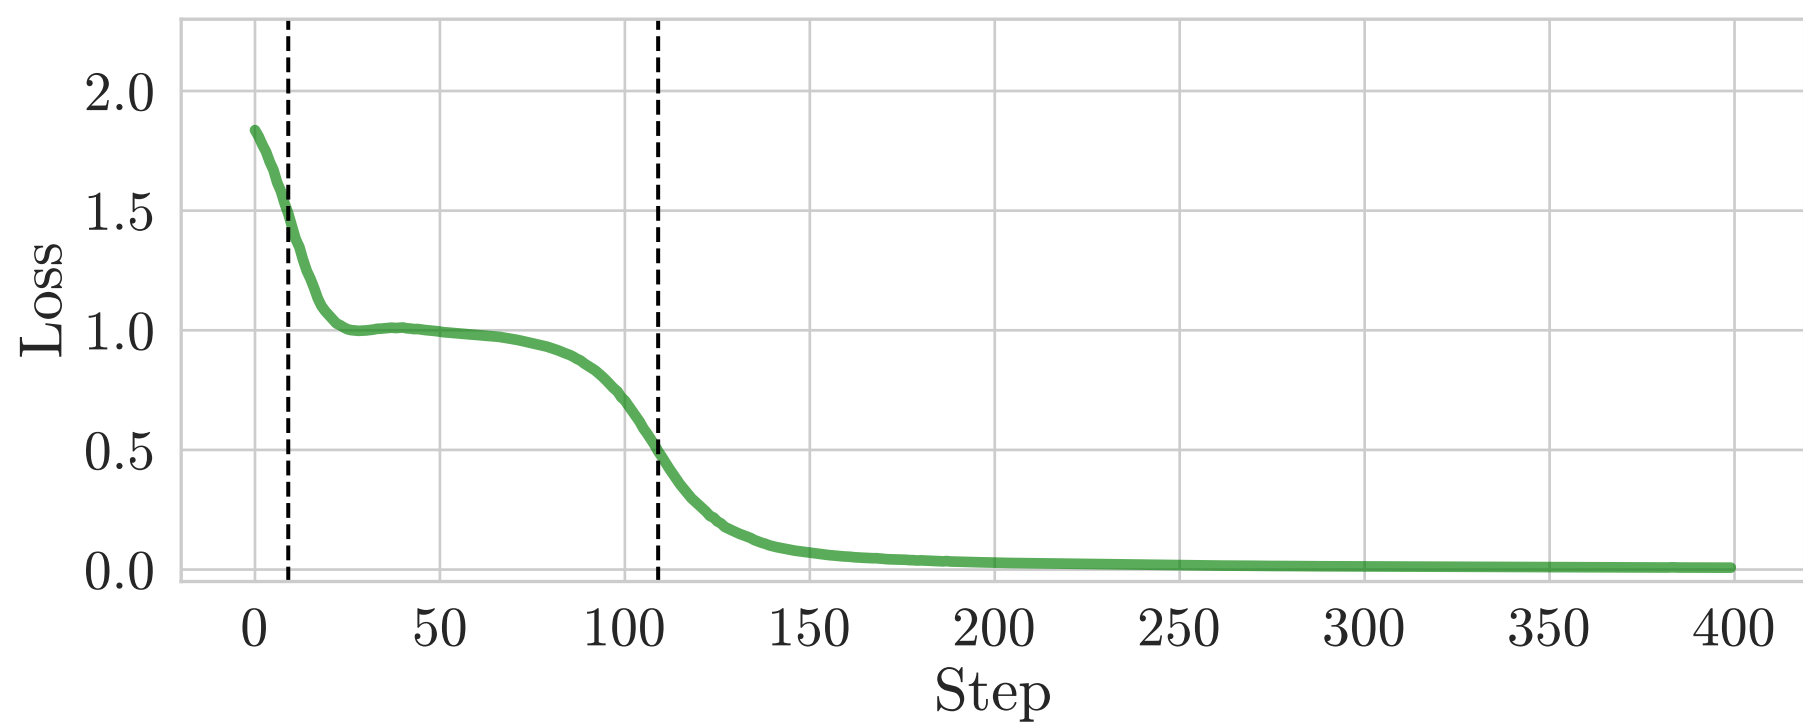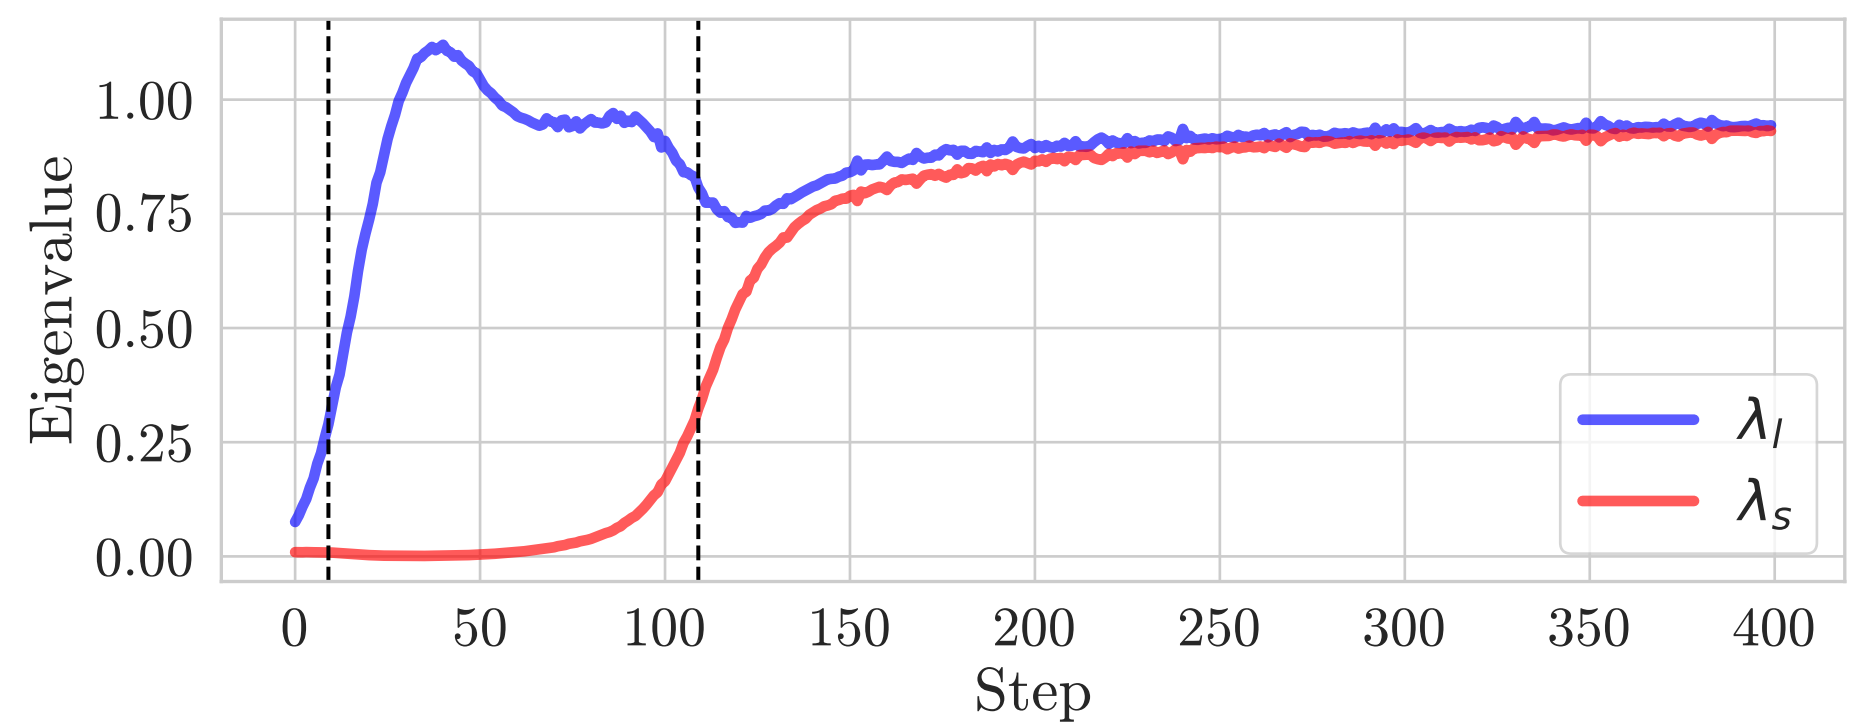

Supplement: supplementary_material [file dim_loss_eig.pdf › feature_preference/non_linear/figure/dim_loss_eig.pdf]

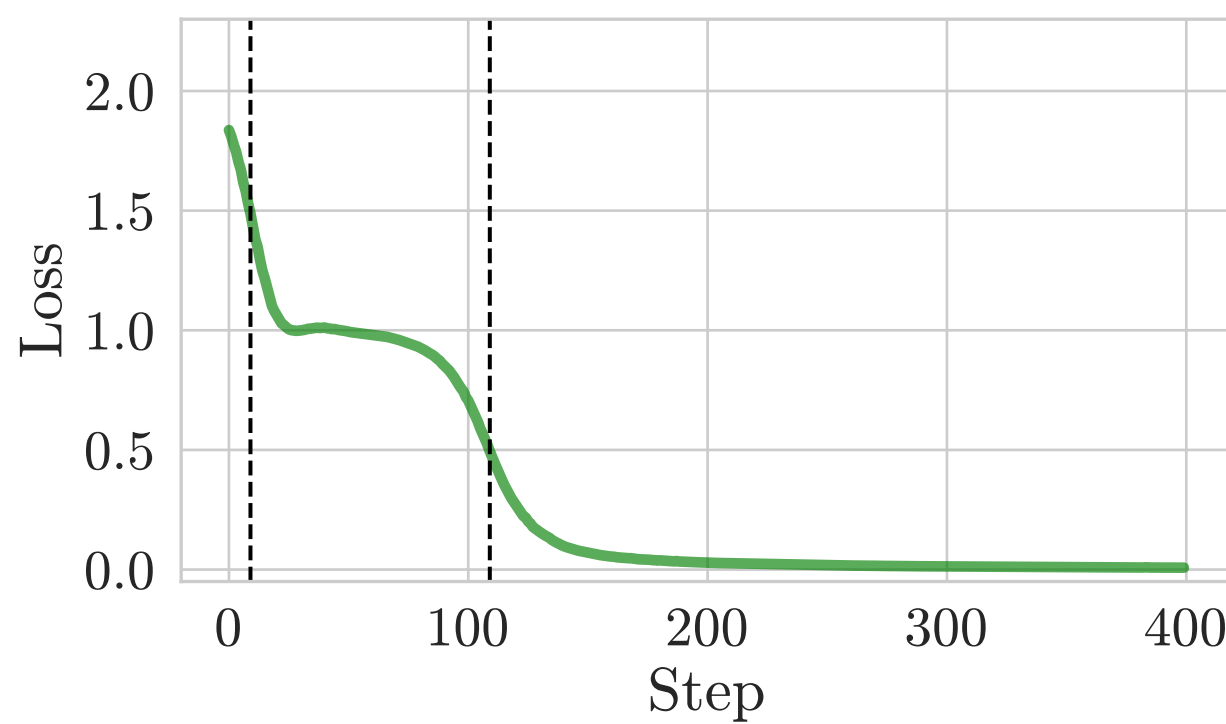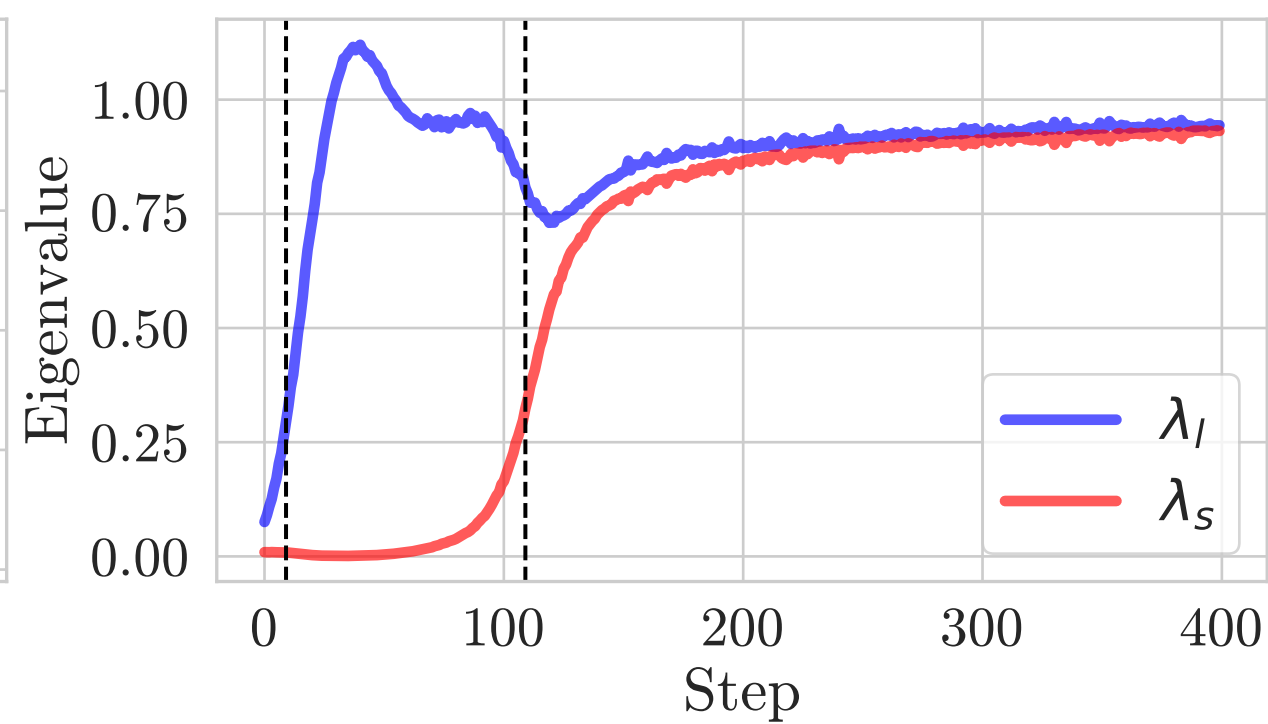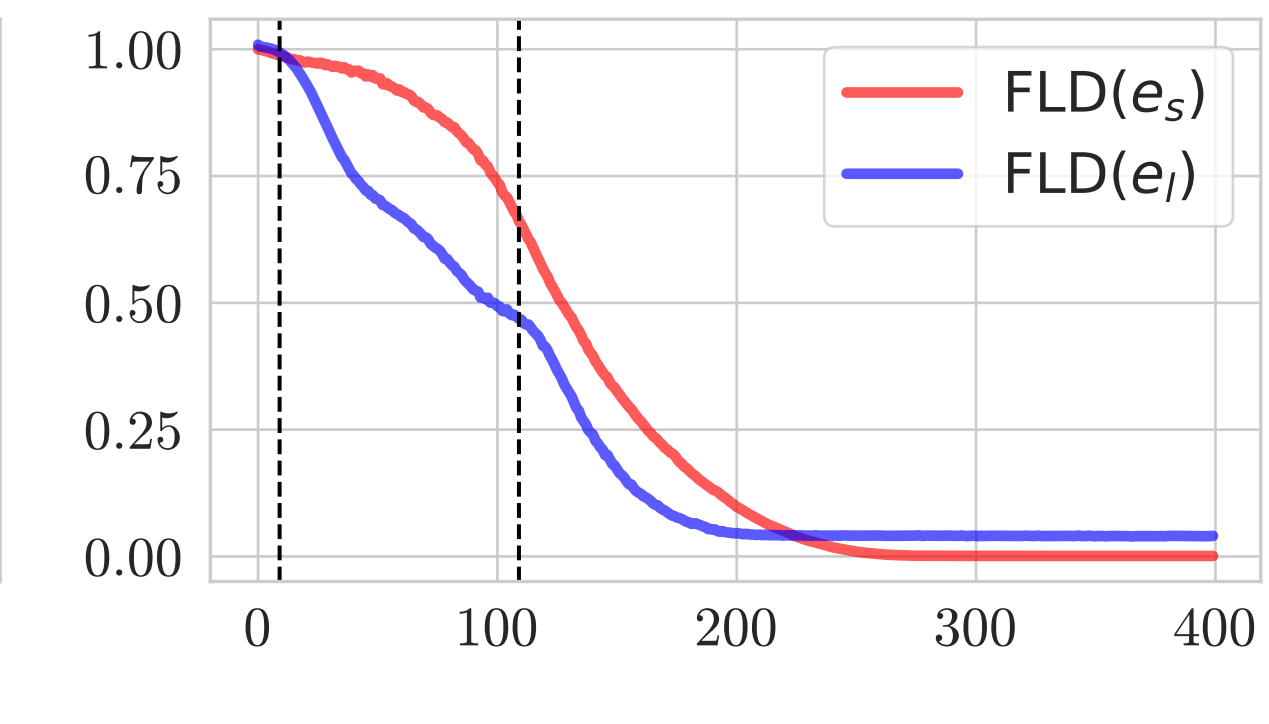

Supplement: supplementary_material [file dim_loss_eig_fld.pdf › feature_preference/non_linear/figure/dim_loss_eig_fld.pdf]

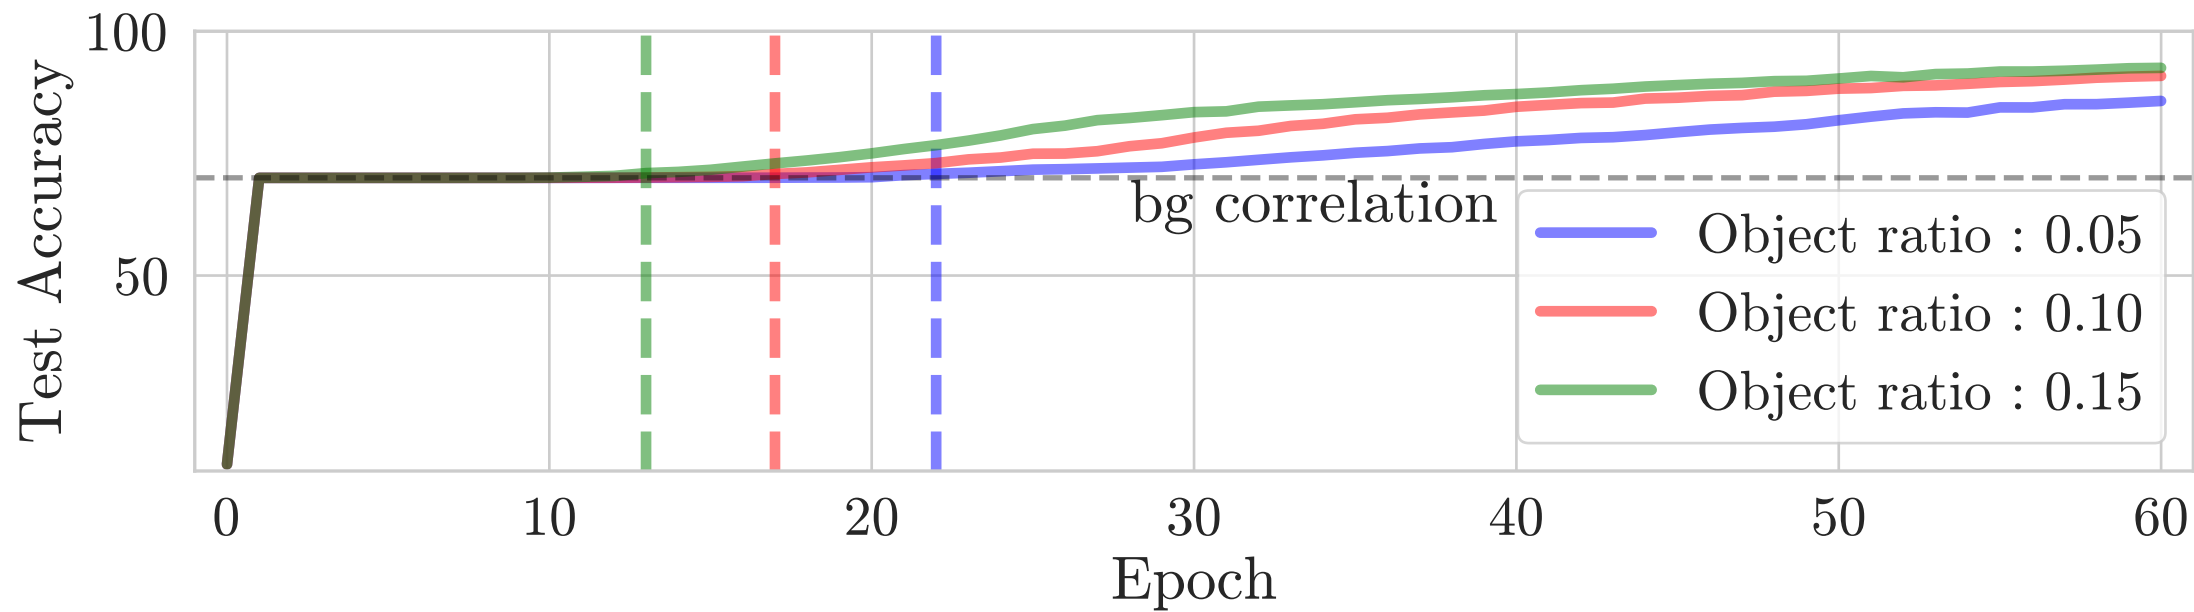

Supplement: supplementary_material [file loss_acc.pdf › feature_preference/practical/figure/loss_acc.pdf]

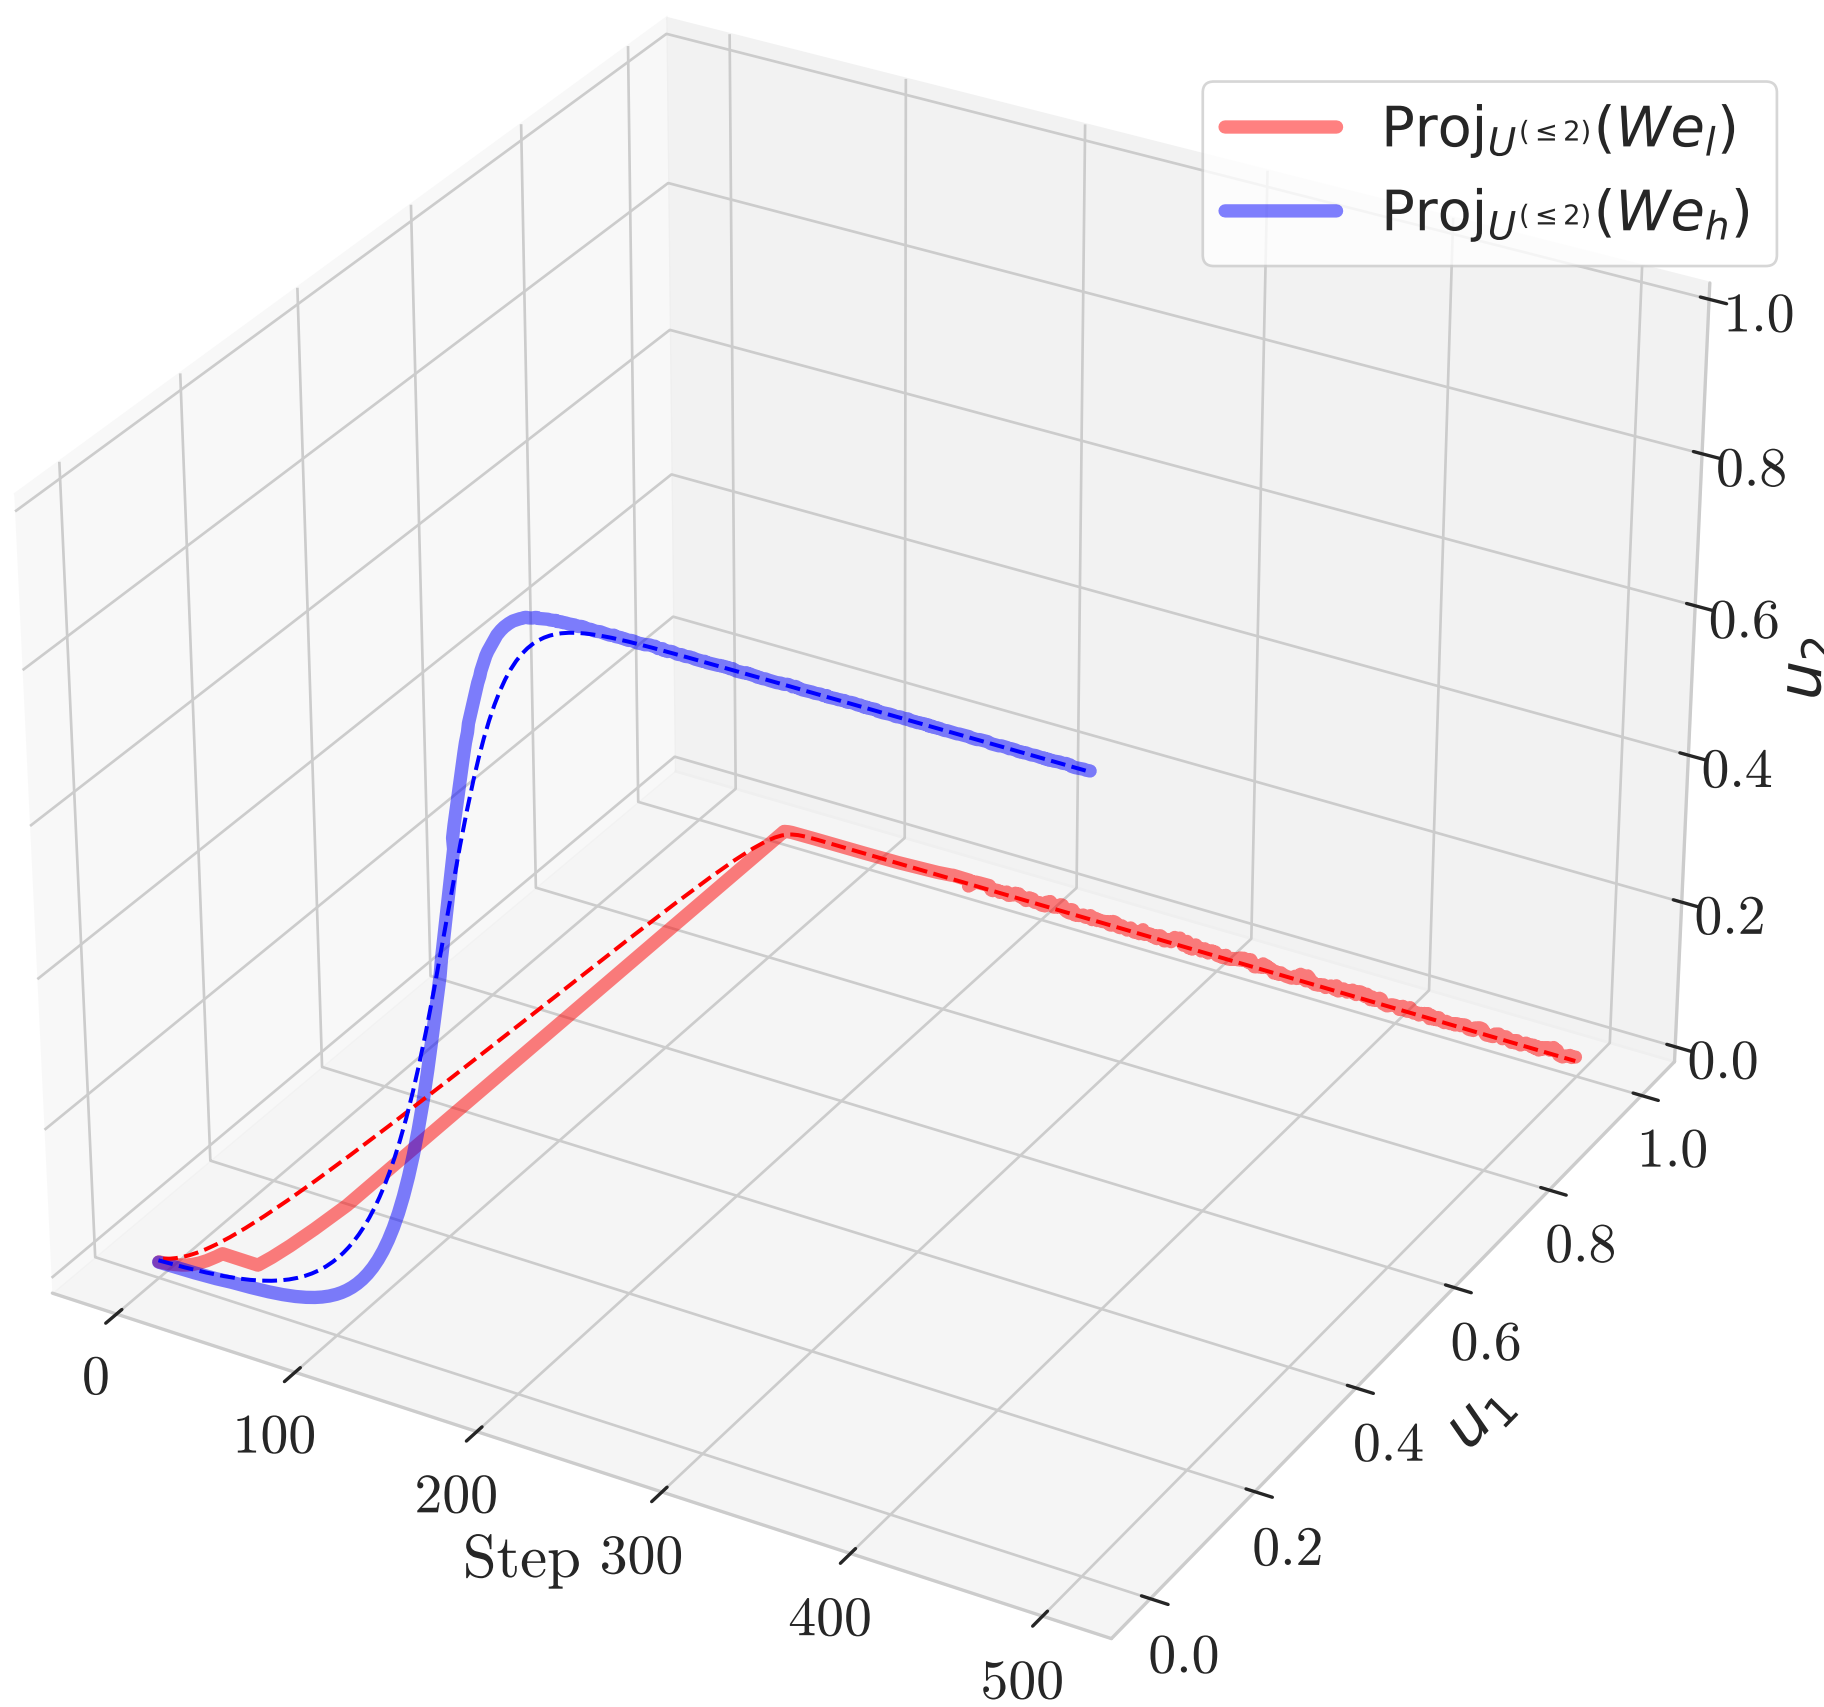

Supplement: supplementary_material [file freq_3d.pdf › frequency_shortcut/linear/figure/freq_3d.pdf]

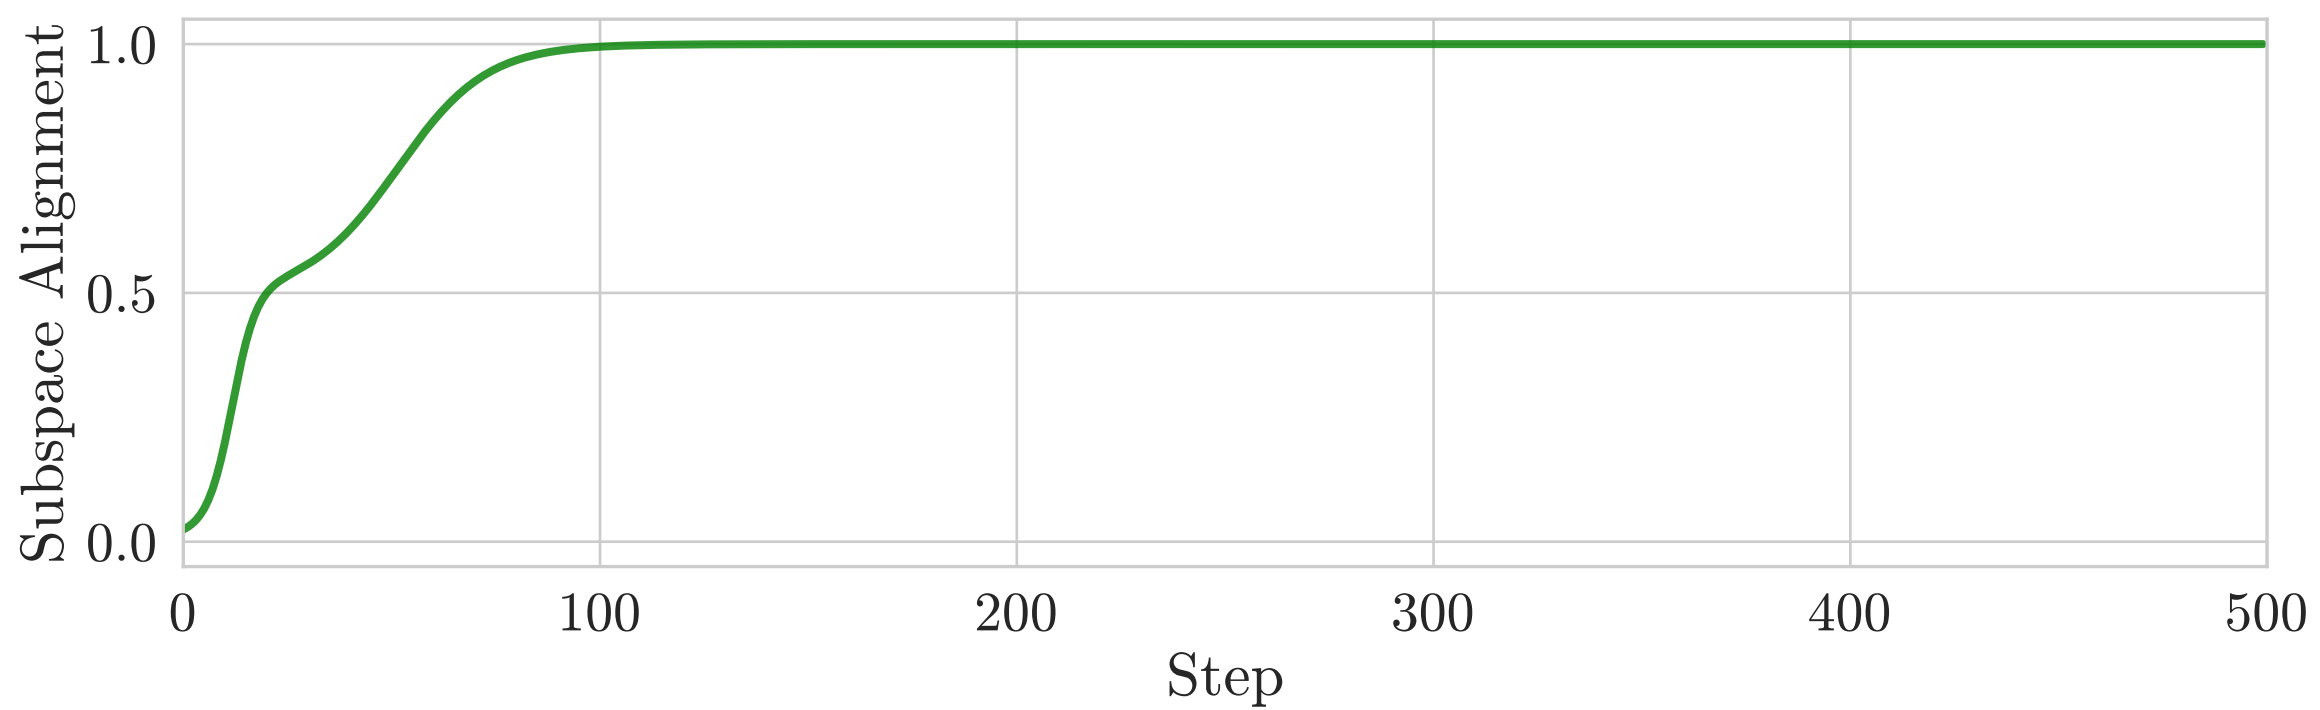

Supplement: supplementary_material [file freq_alignment.pdf › frequency_shortcut/linear/figure/freq_alignment.pdf]

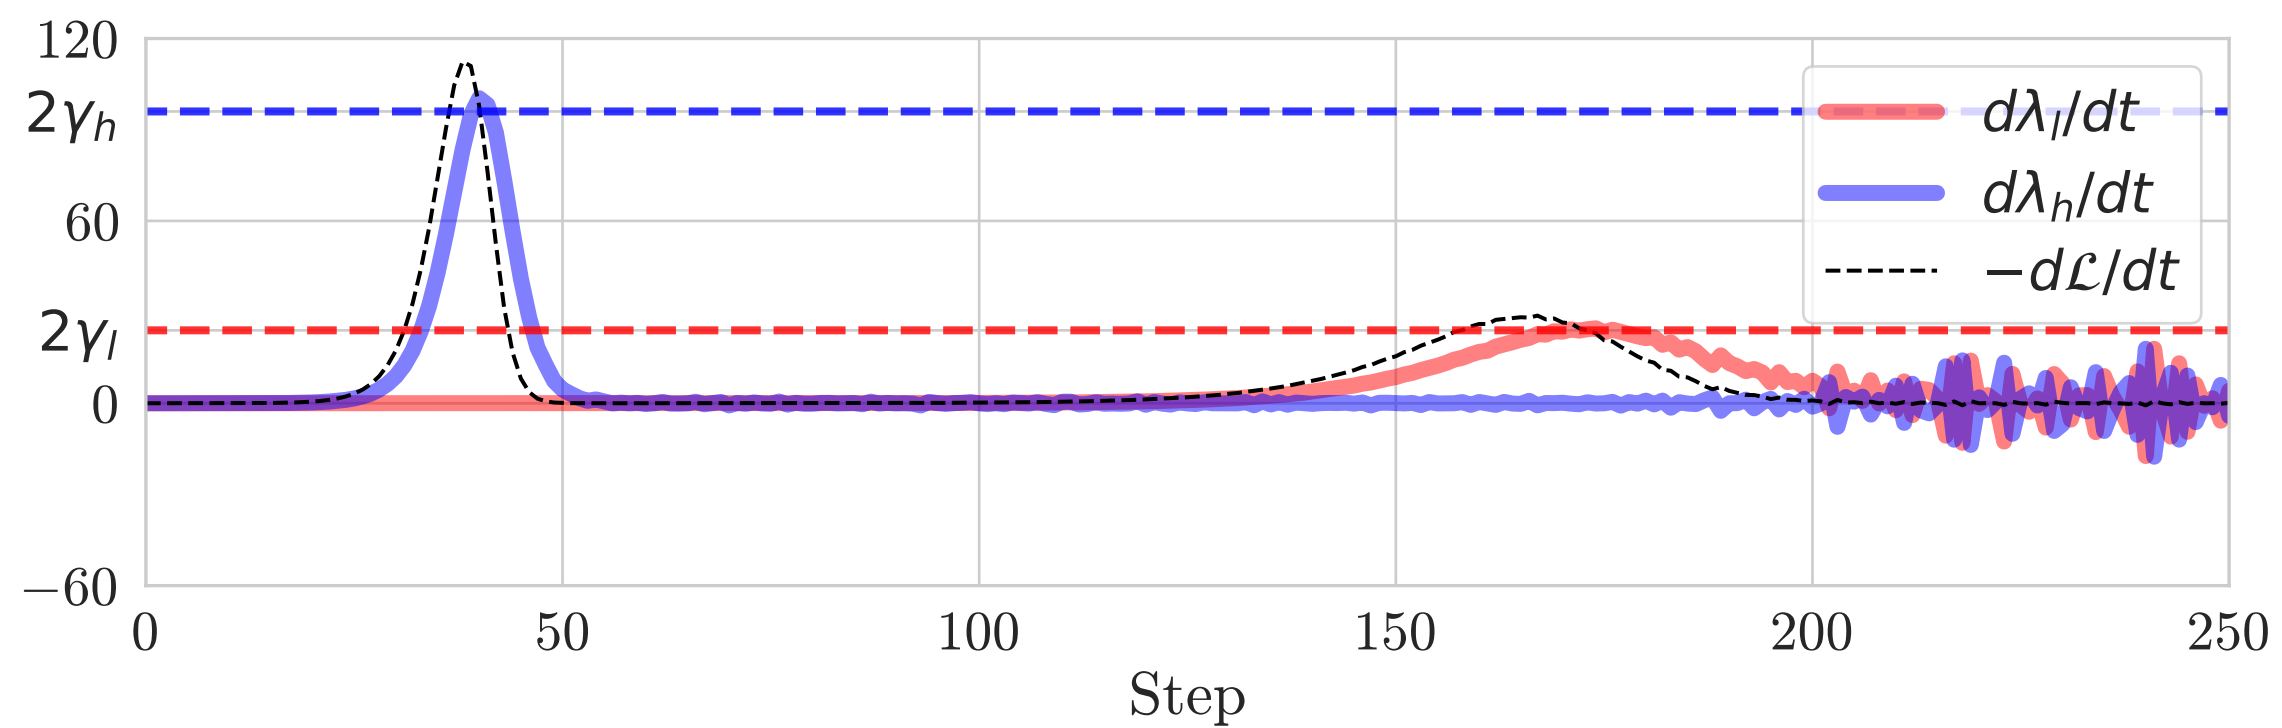

Supplement: supplementary_material [file freq_dcdt_dldt.pdf › frequency_shortcut/linear/figure/freq_dcdt_dldt.pdf]

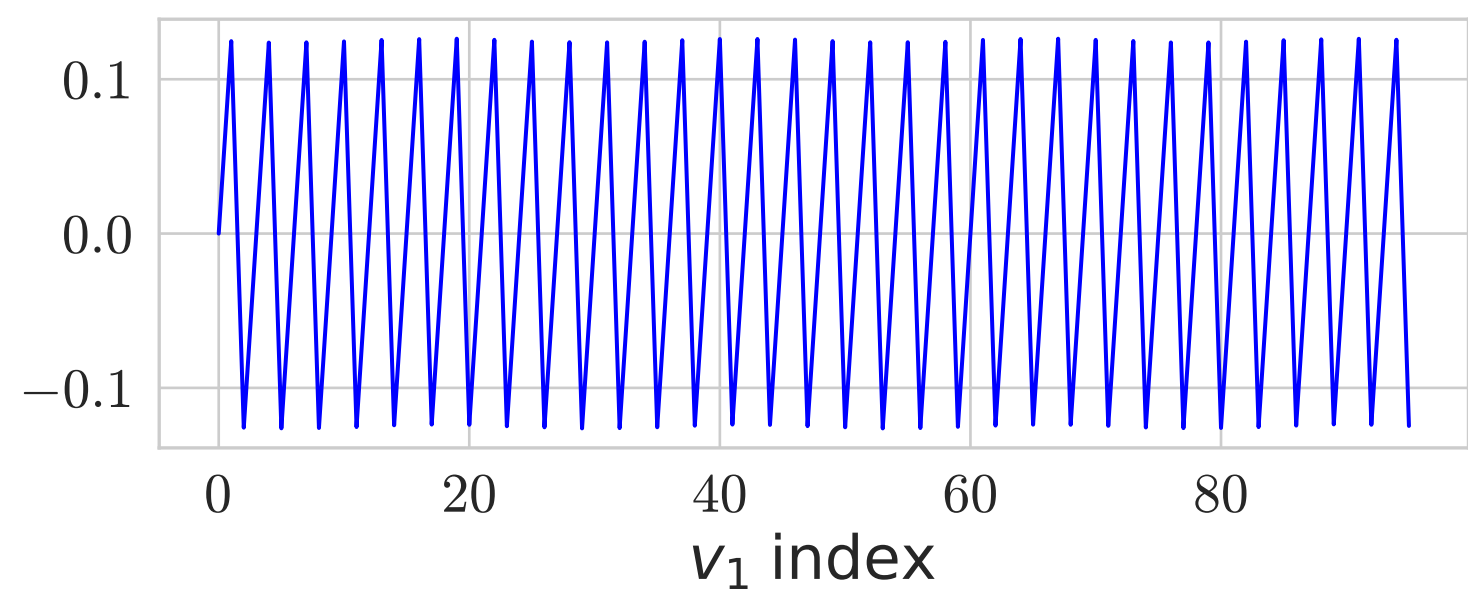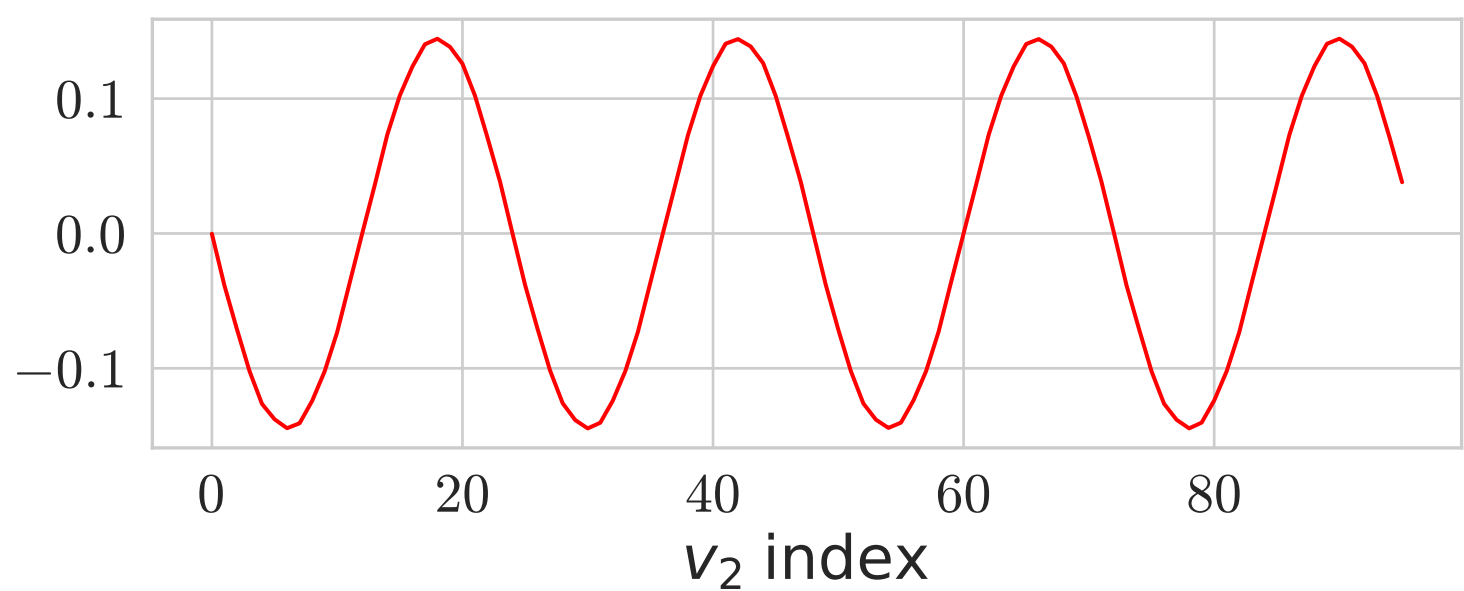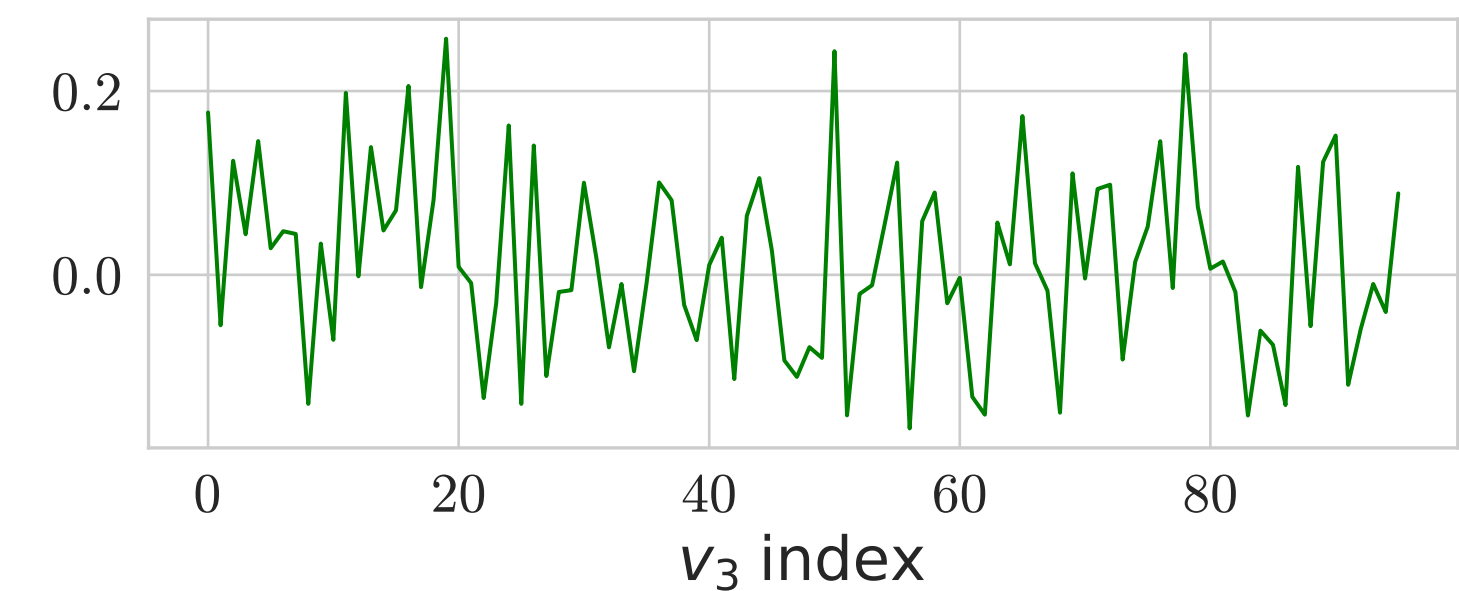

Supplement: supplementary_material [file freq_gamma_eigenvectors.pdf › frequency_shortcut/linear/figure/freq_gamma_eigenvectors.pdf]

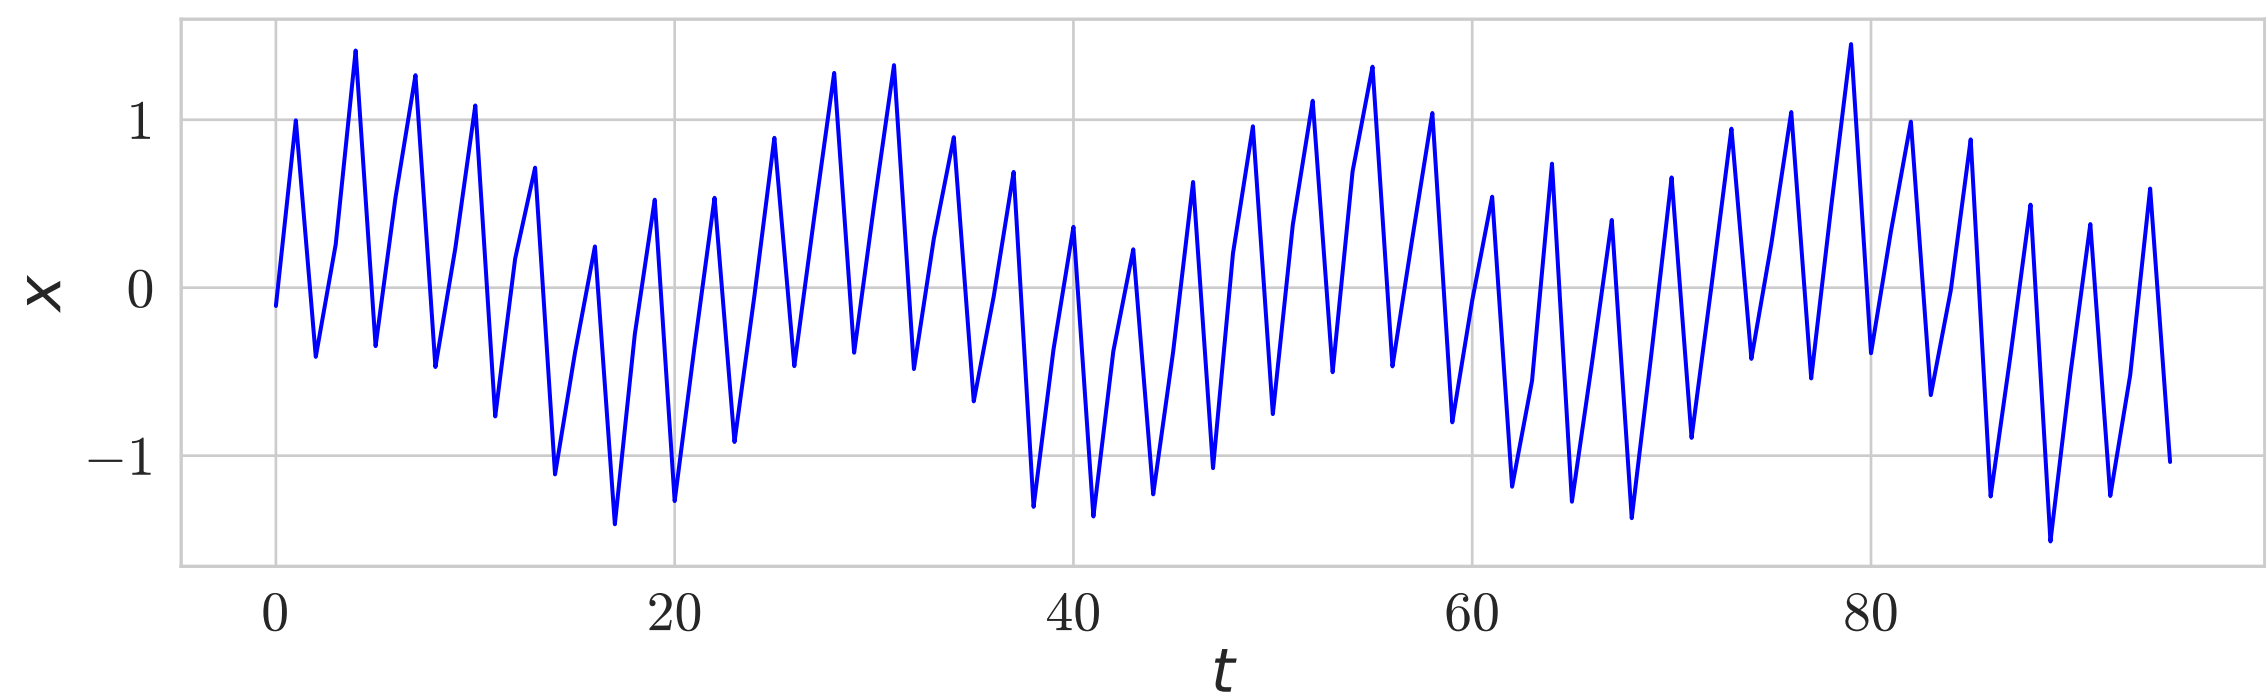

Supplement: supplementary_material [file freq_input.pdf › frequency_shortcut/linear/figure/freq_input.pdf]

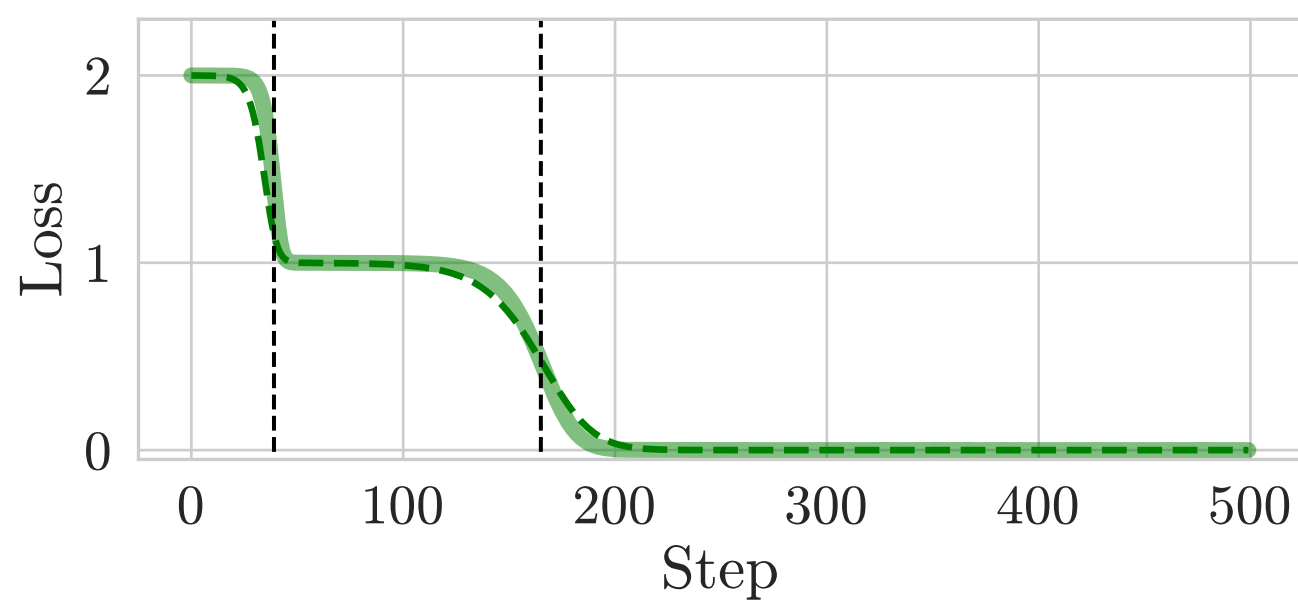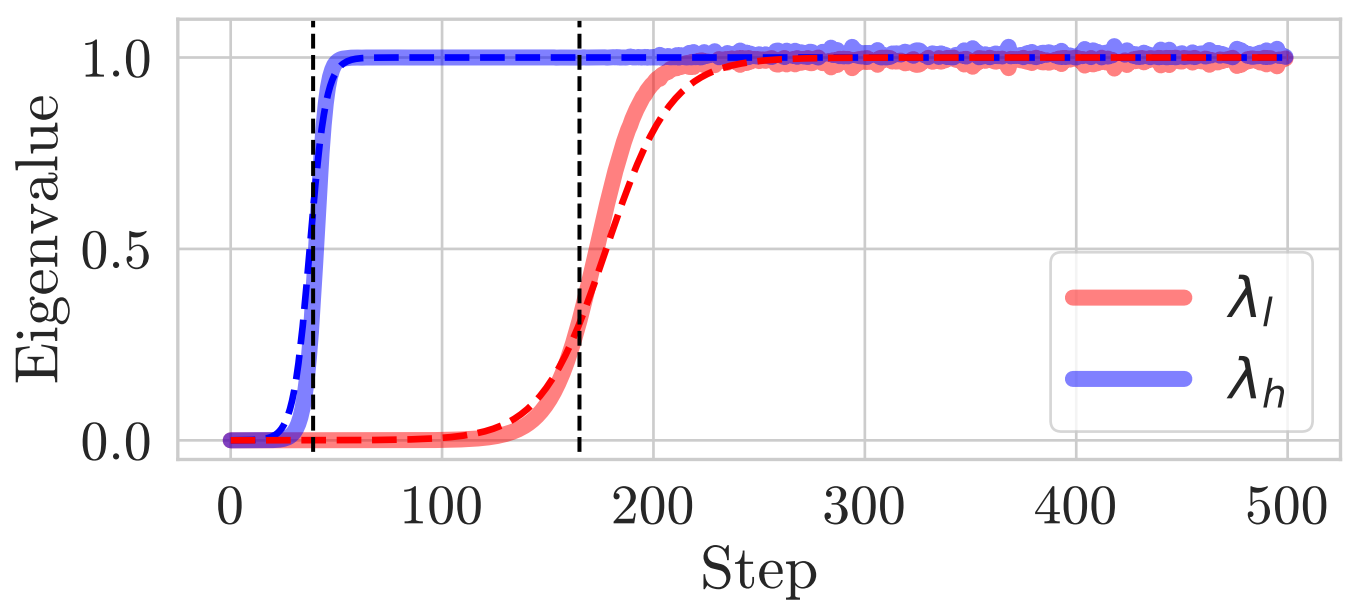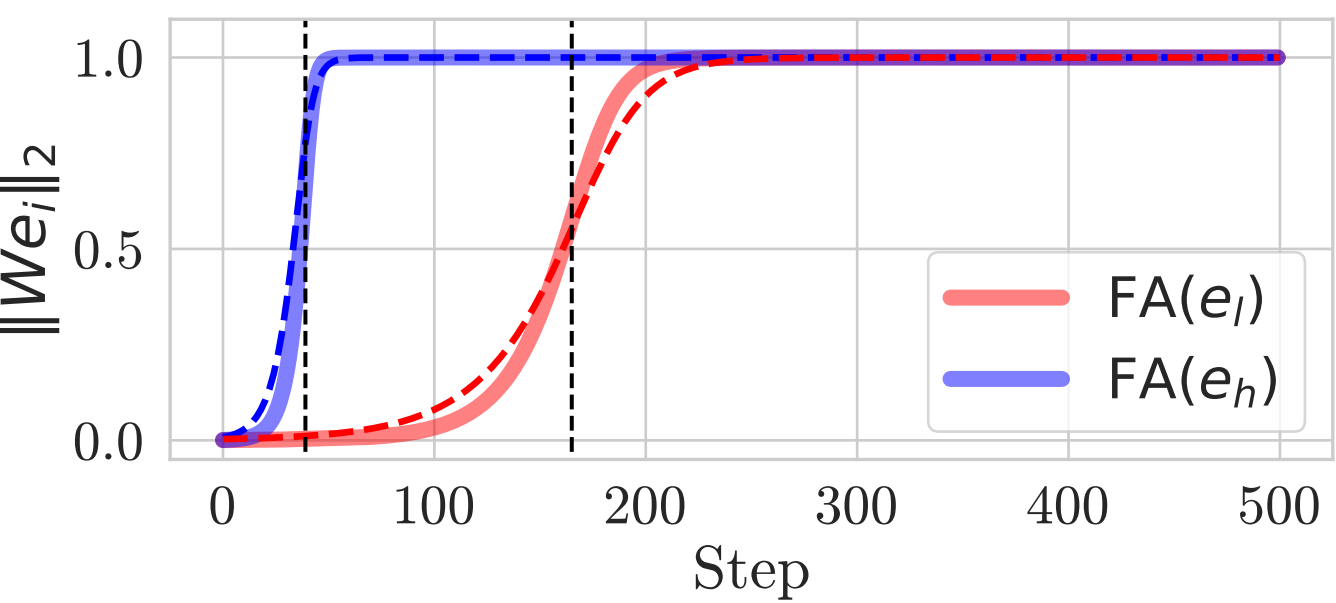

Supplement: supplementary_material [file freq_loss_eig_align.pdf › frequency_shortcut/linear/figure/freq_loss_eig_align.pdf]

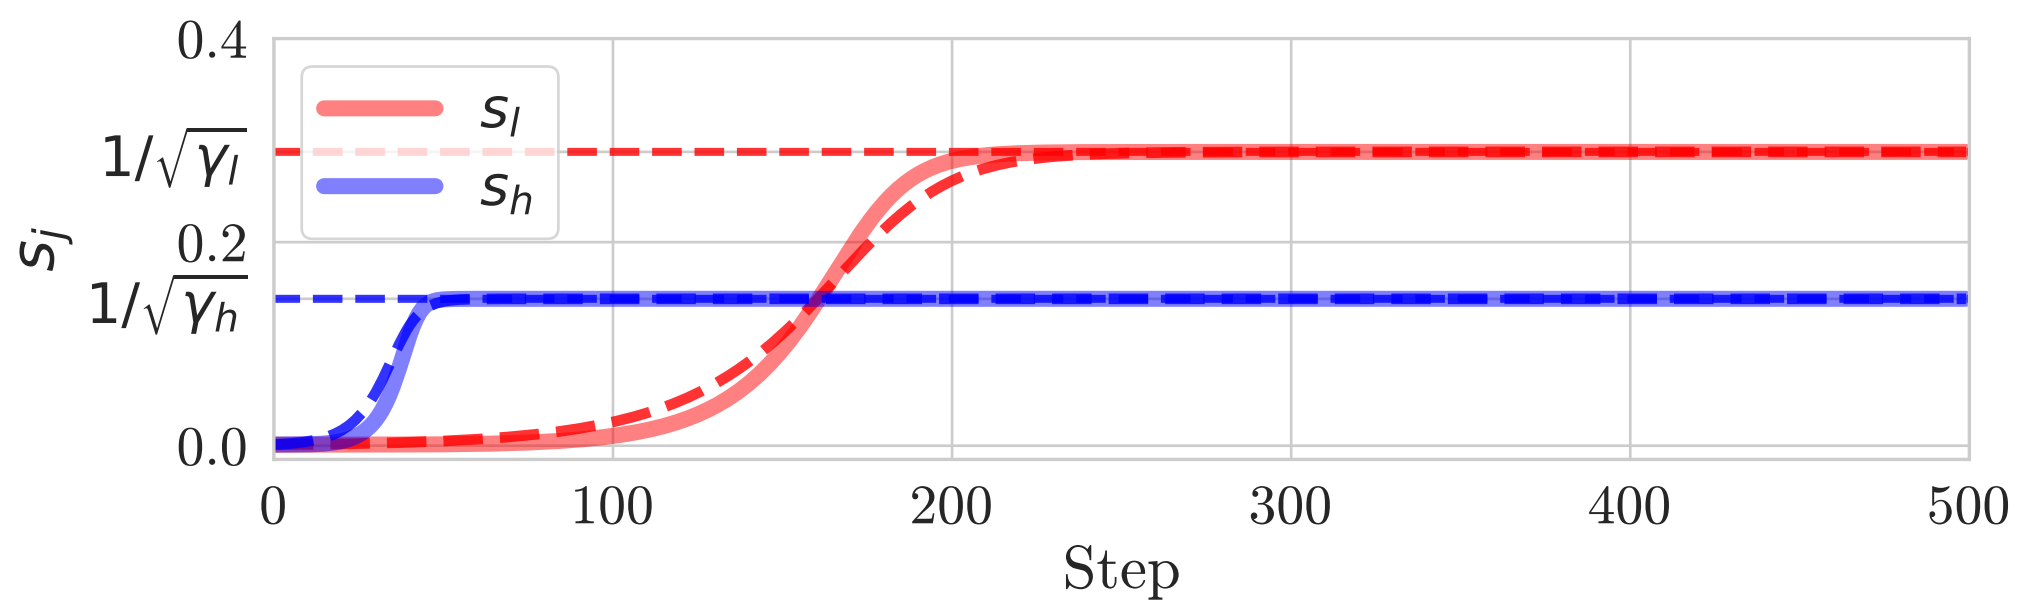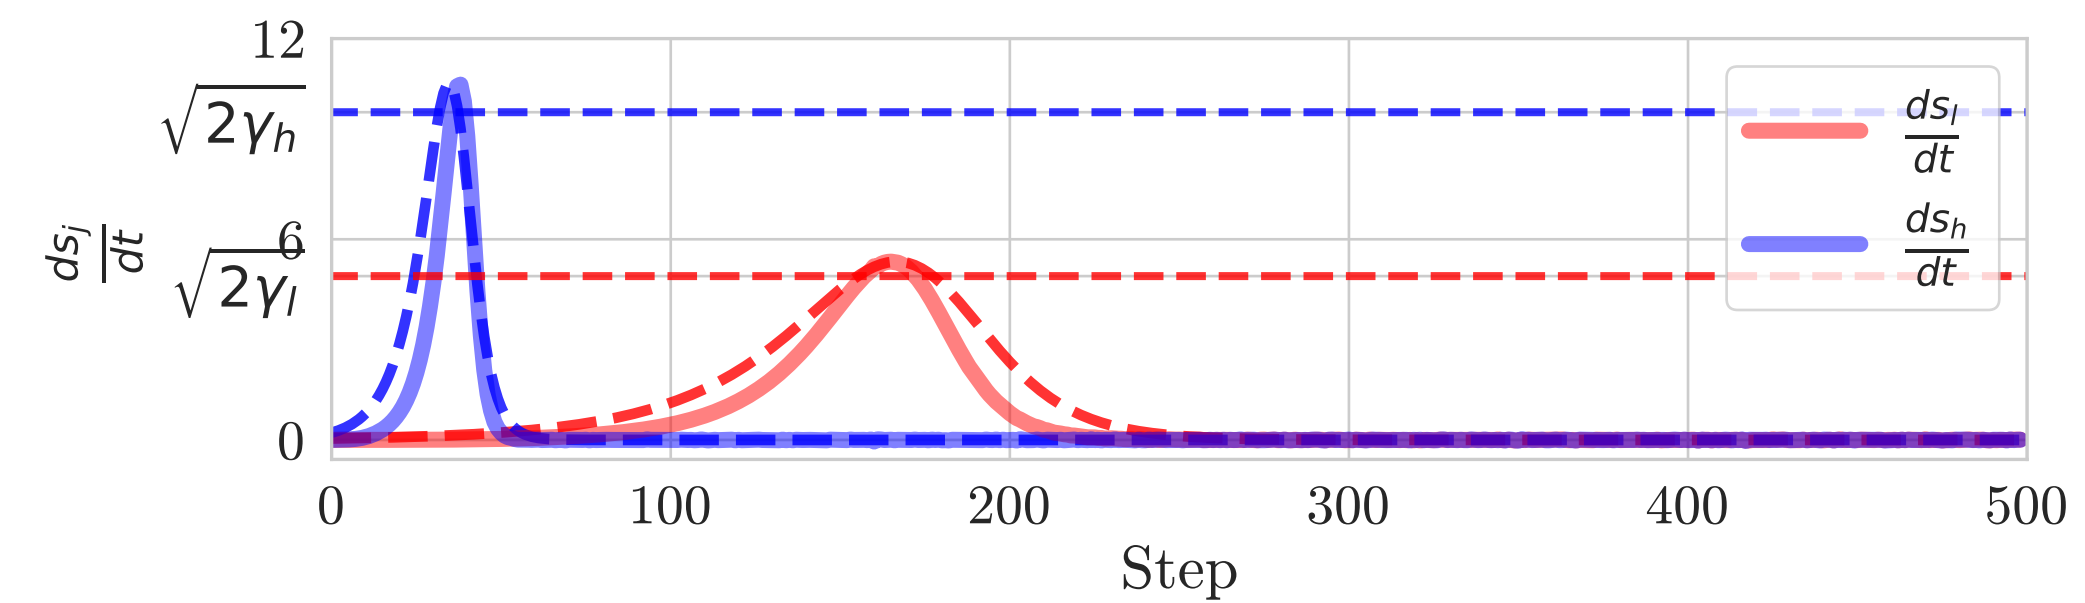

Supplement: supplementary_material [file freq_s_ds_dt.pdf › frequency_shortcut/linear/figure/freq_s_ds_dt.pdf]

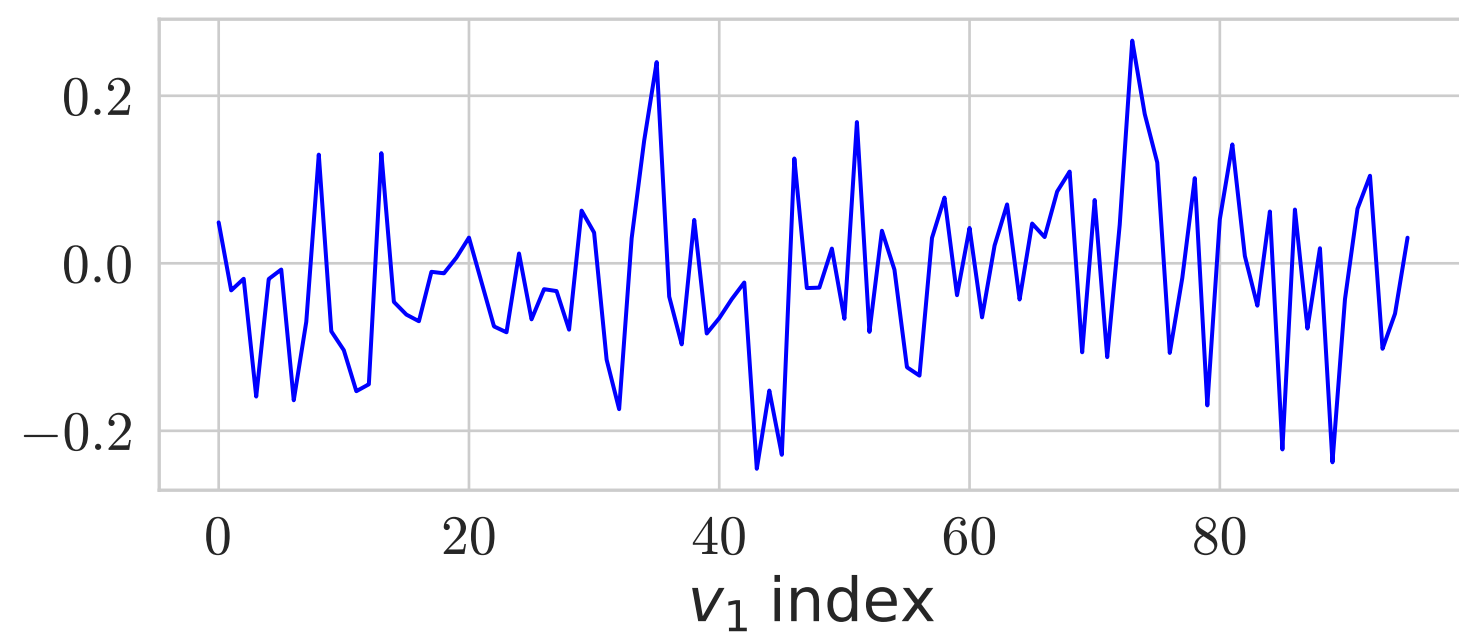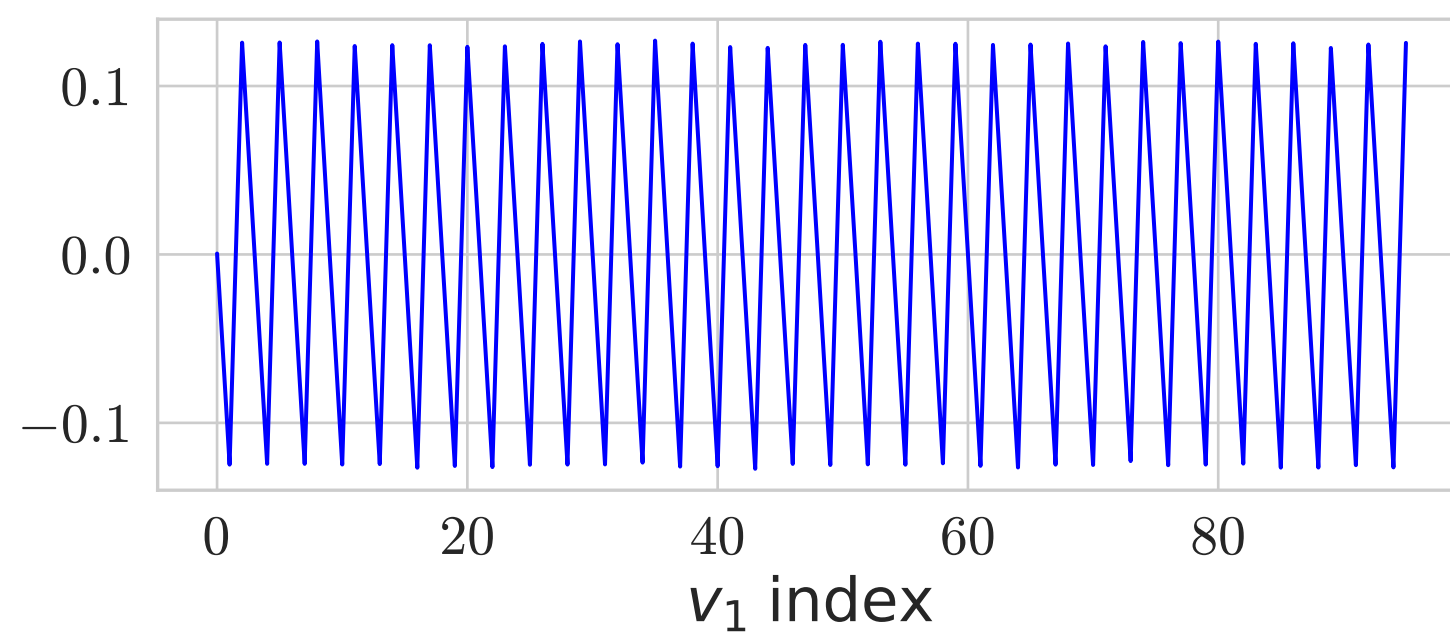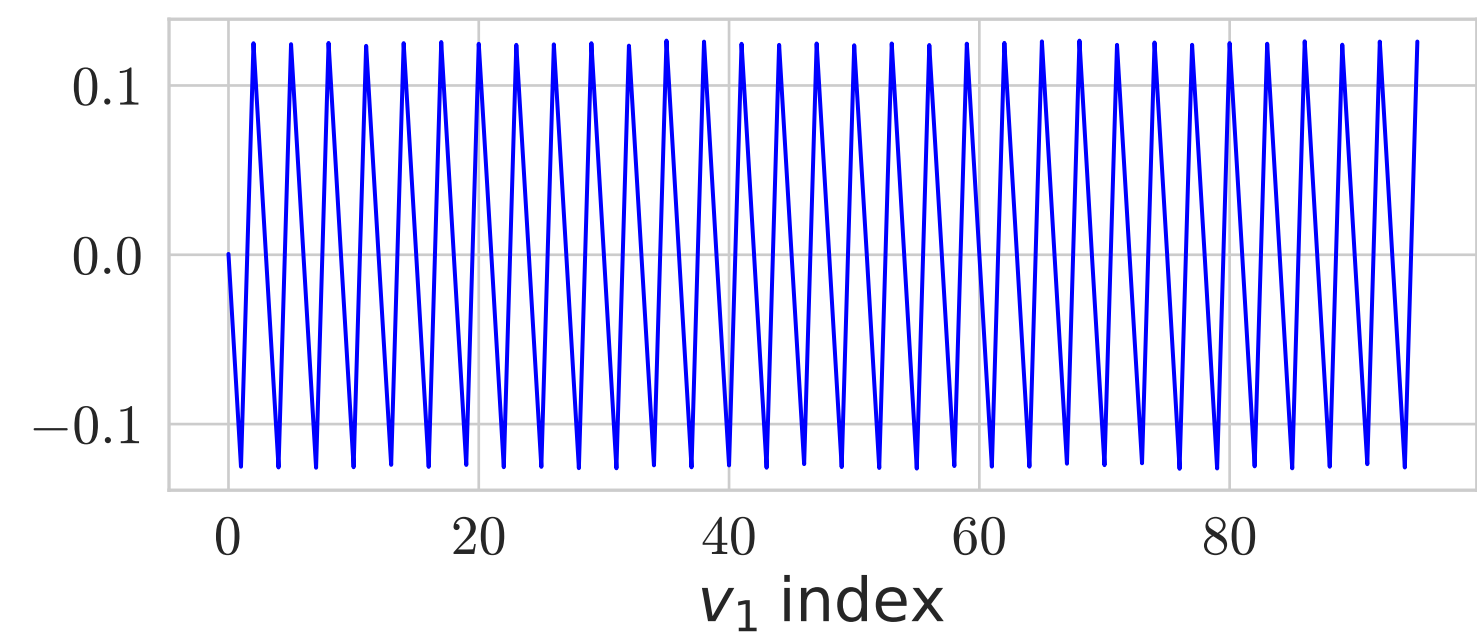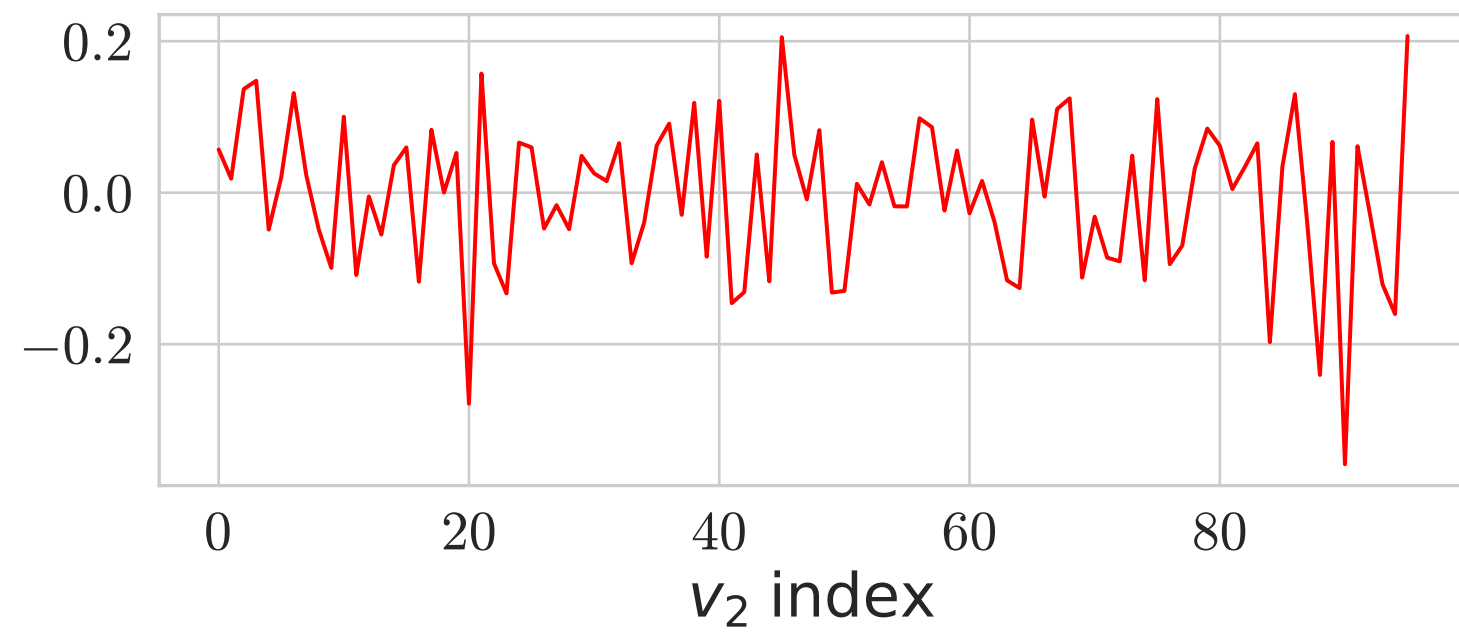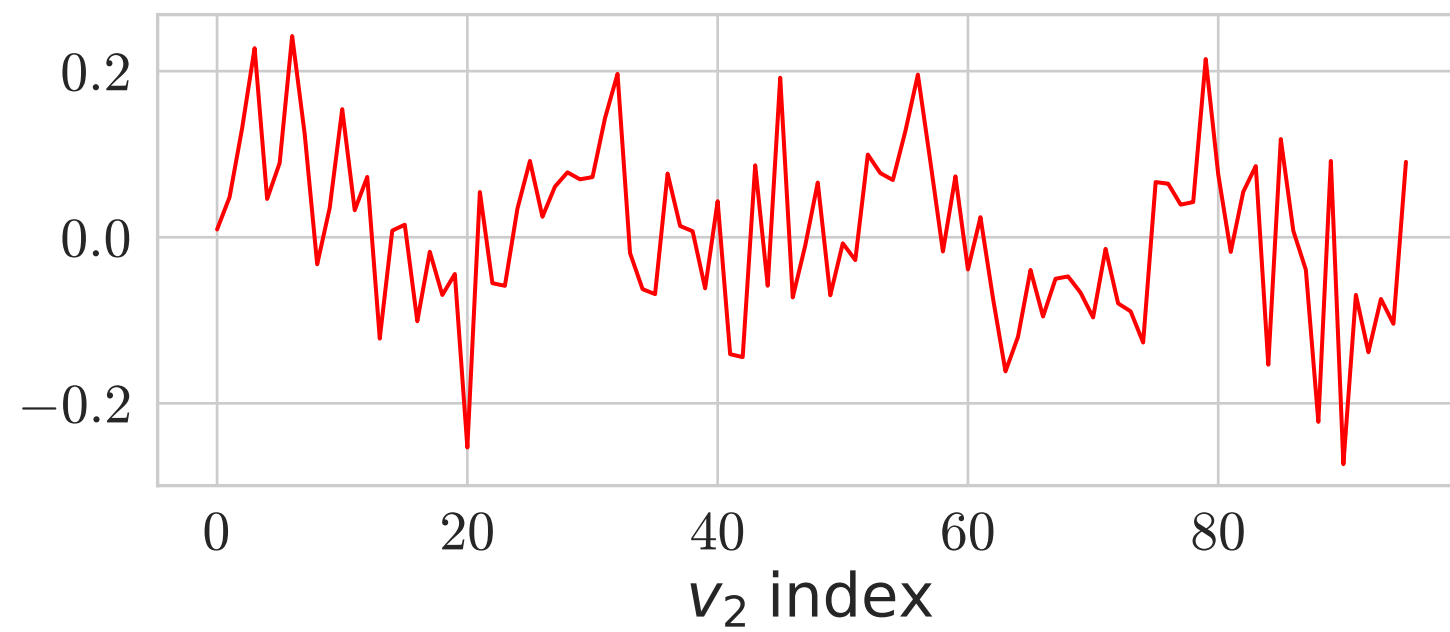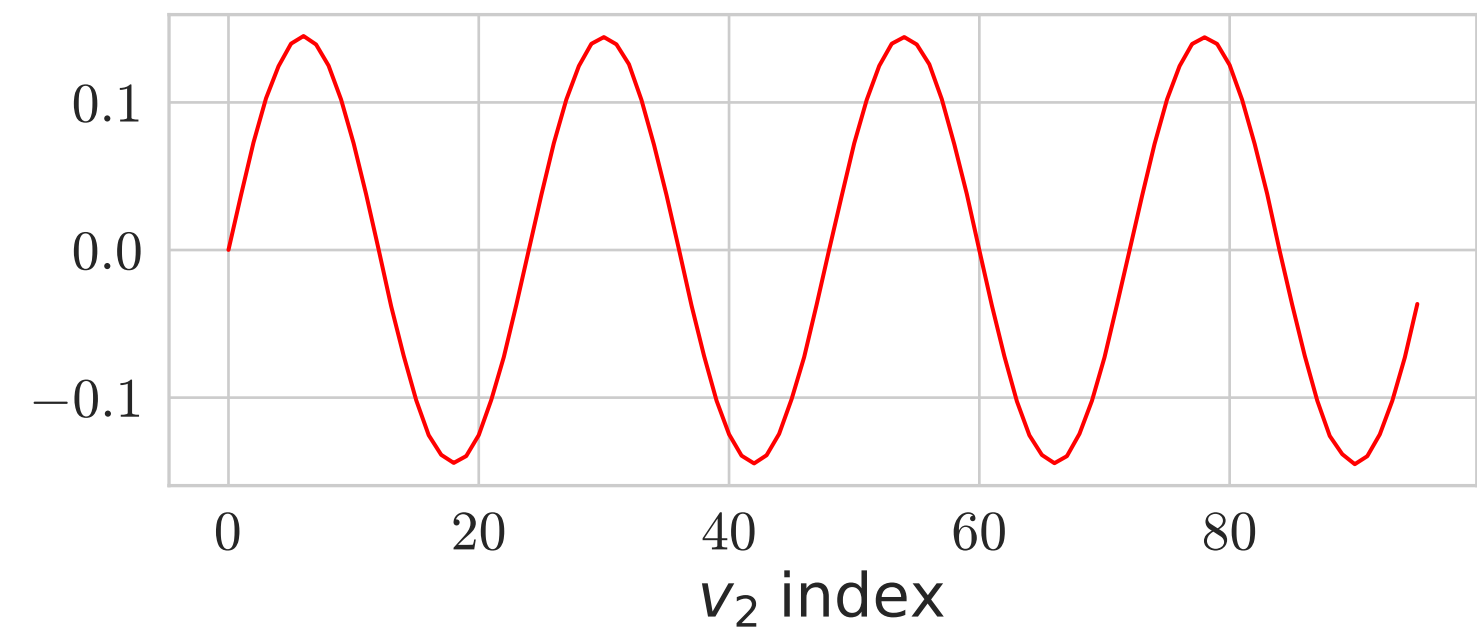

Supplement: supplementary_material [file freq_v.pdf › frequency_shortcut/linear/figure/freq_v.pdf]

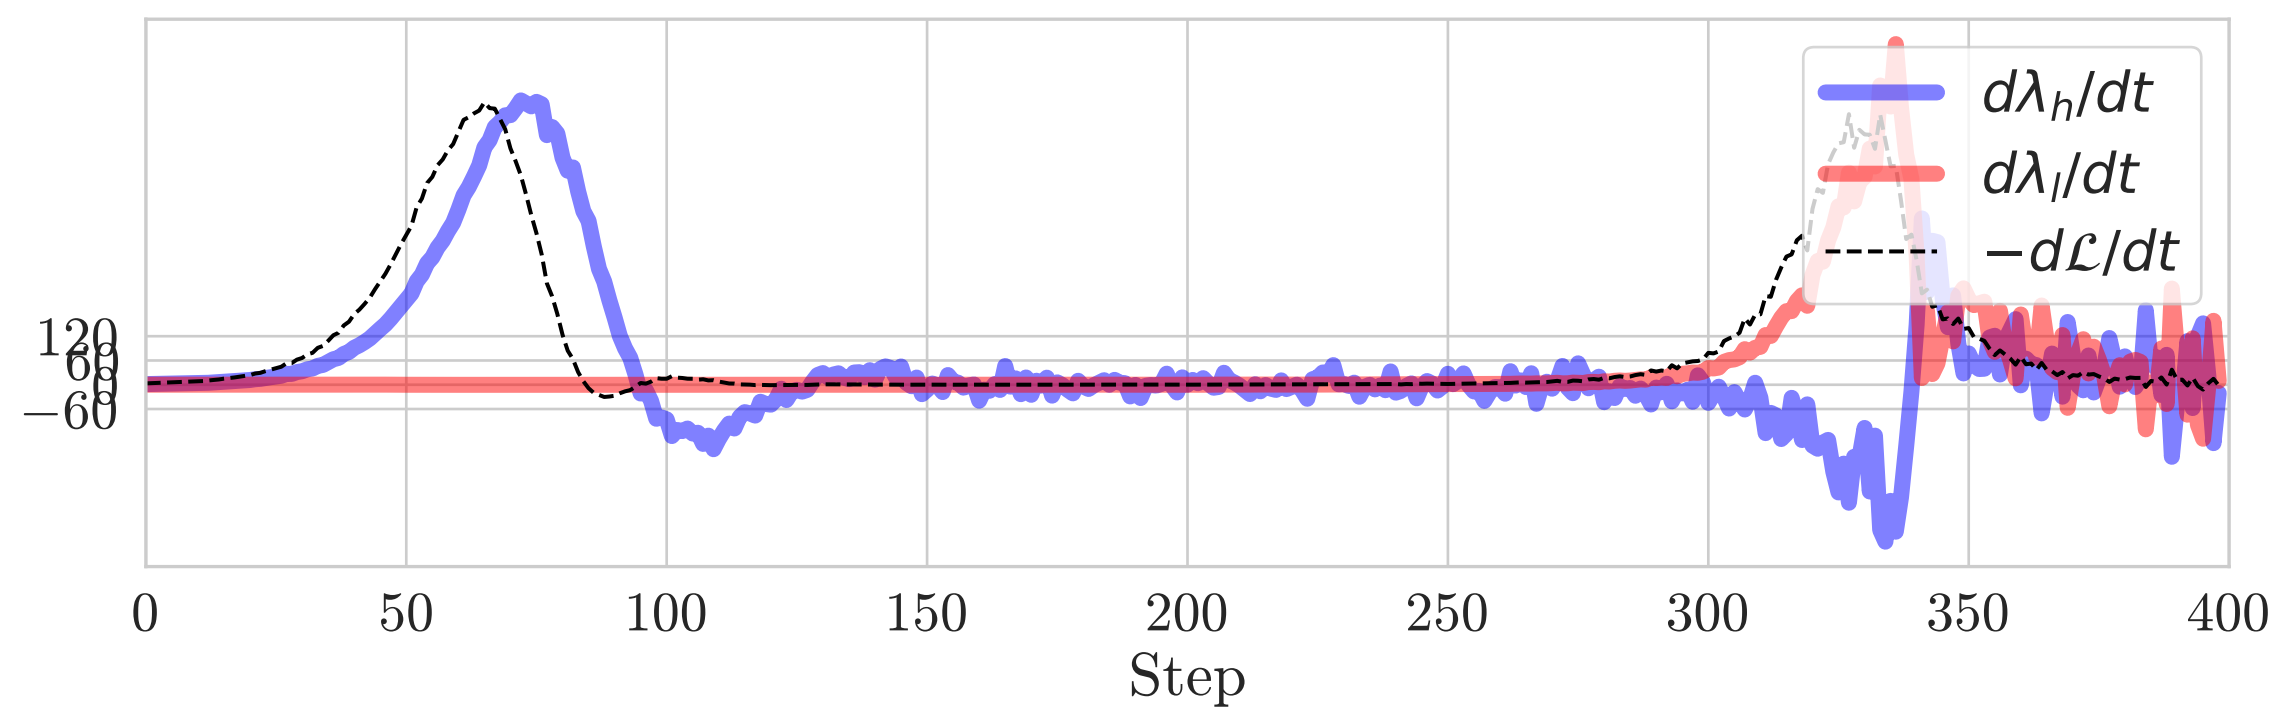

Supplement: supplementary_material [file freq_dcdt_dldt.pdf › frequency_shortcut/non_linear/figure/freq_dcdt_dldt.pdf]

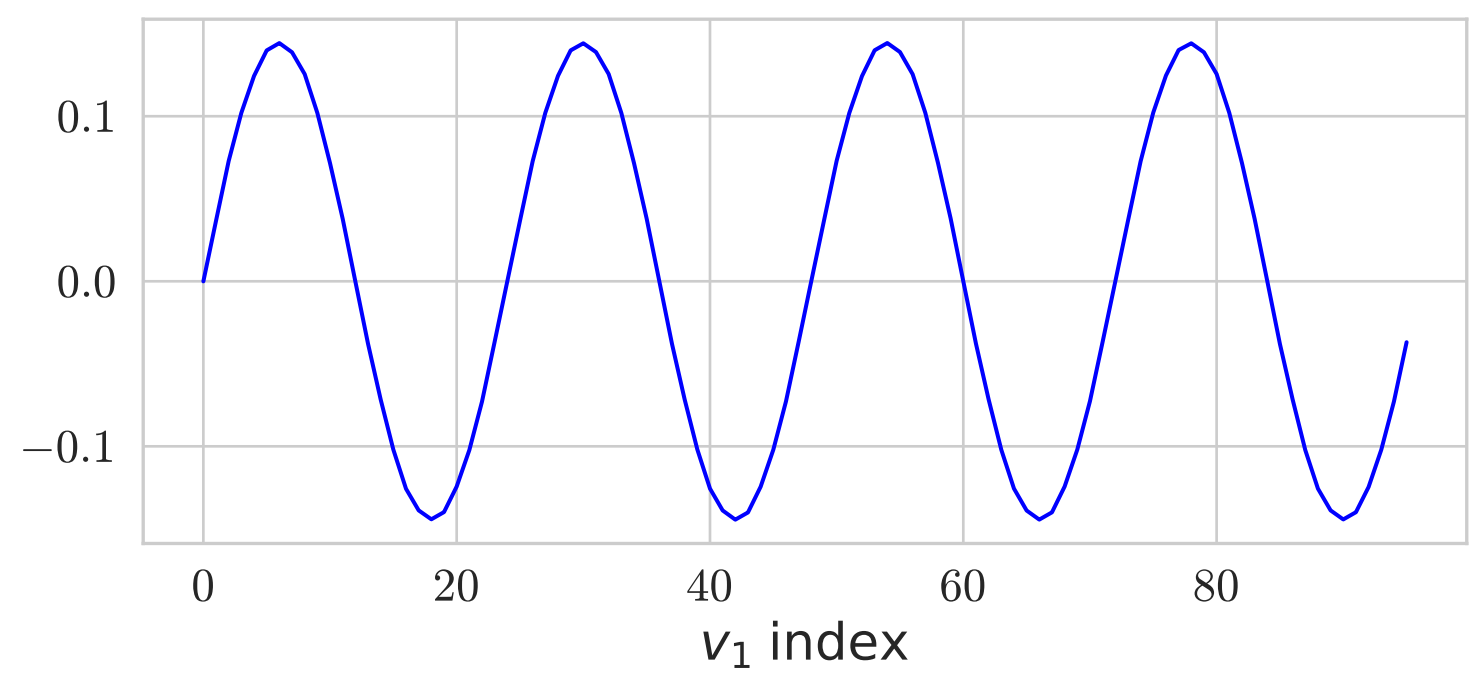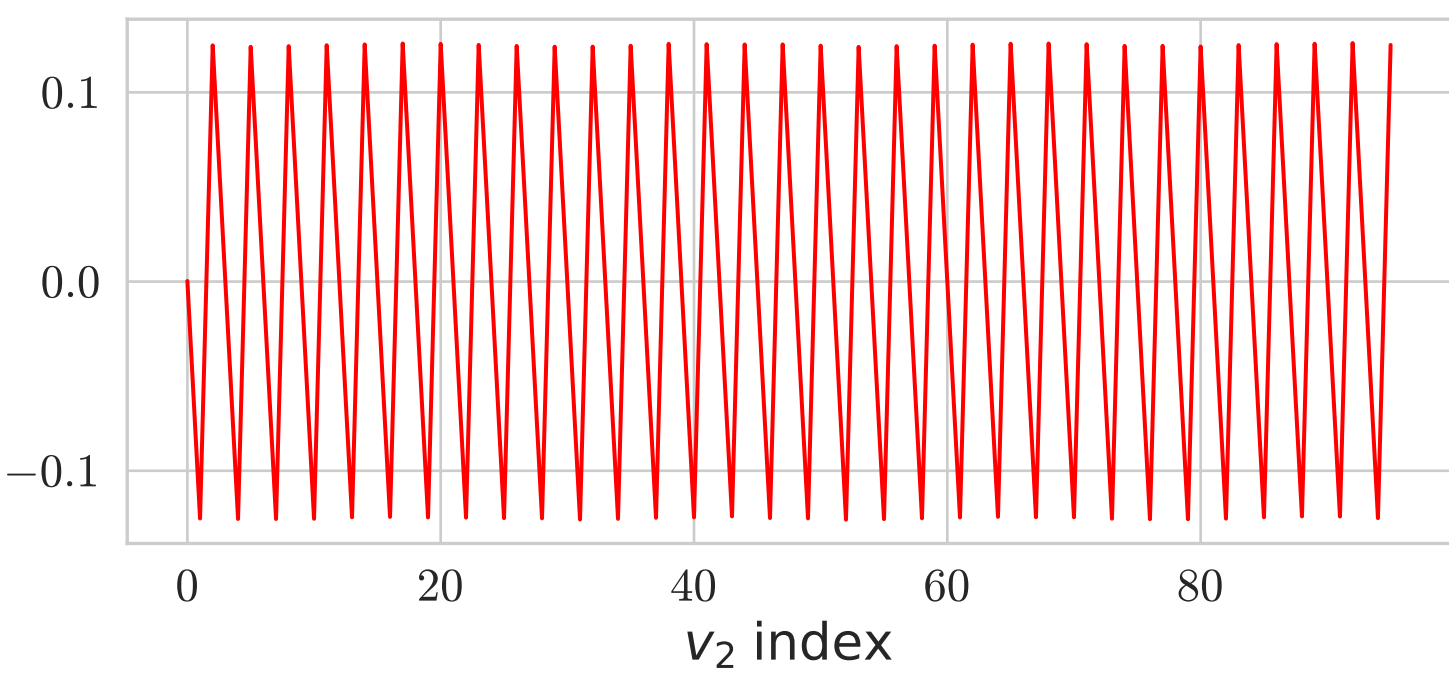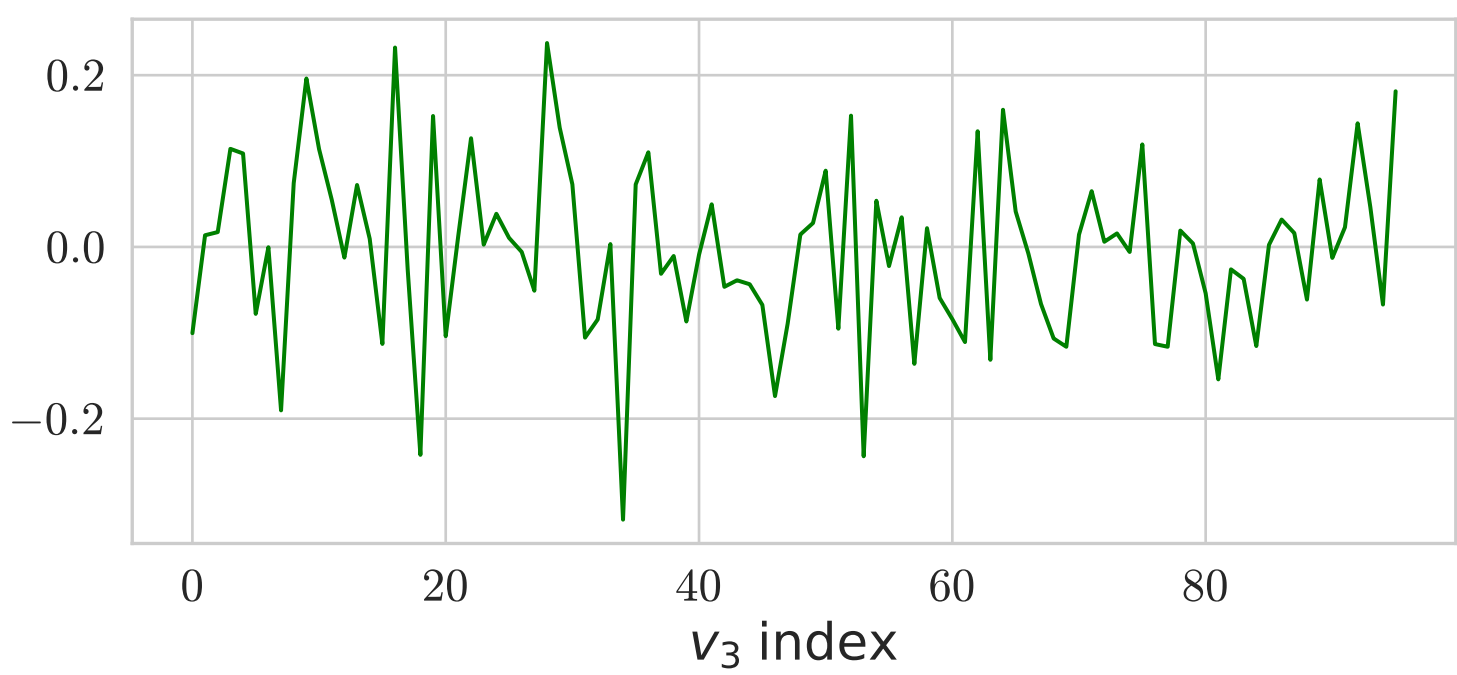

Supplement: supplementary_material [file freq_gamma_eigenvectors.pdf › frequency_shortcut/non_linear/figure/freq_gamma_eigenvectors.pdf]

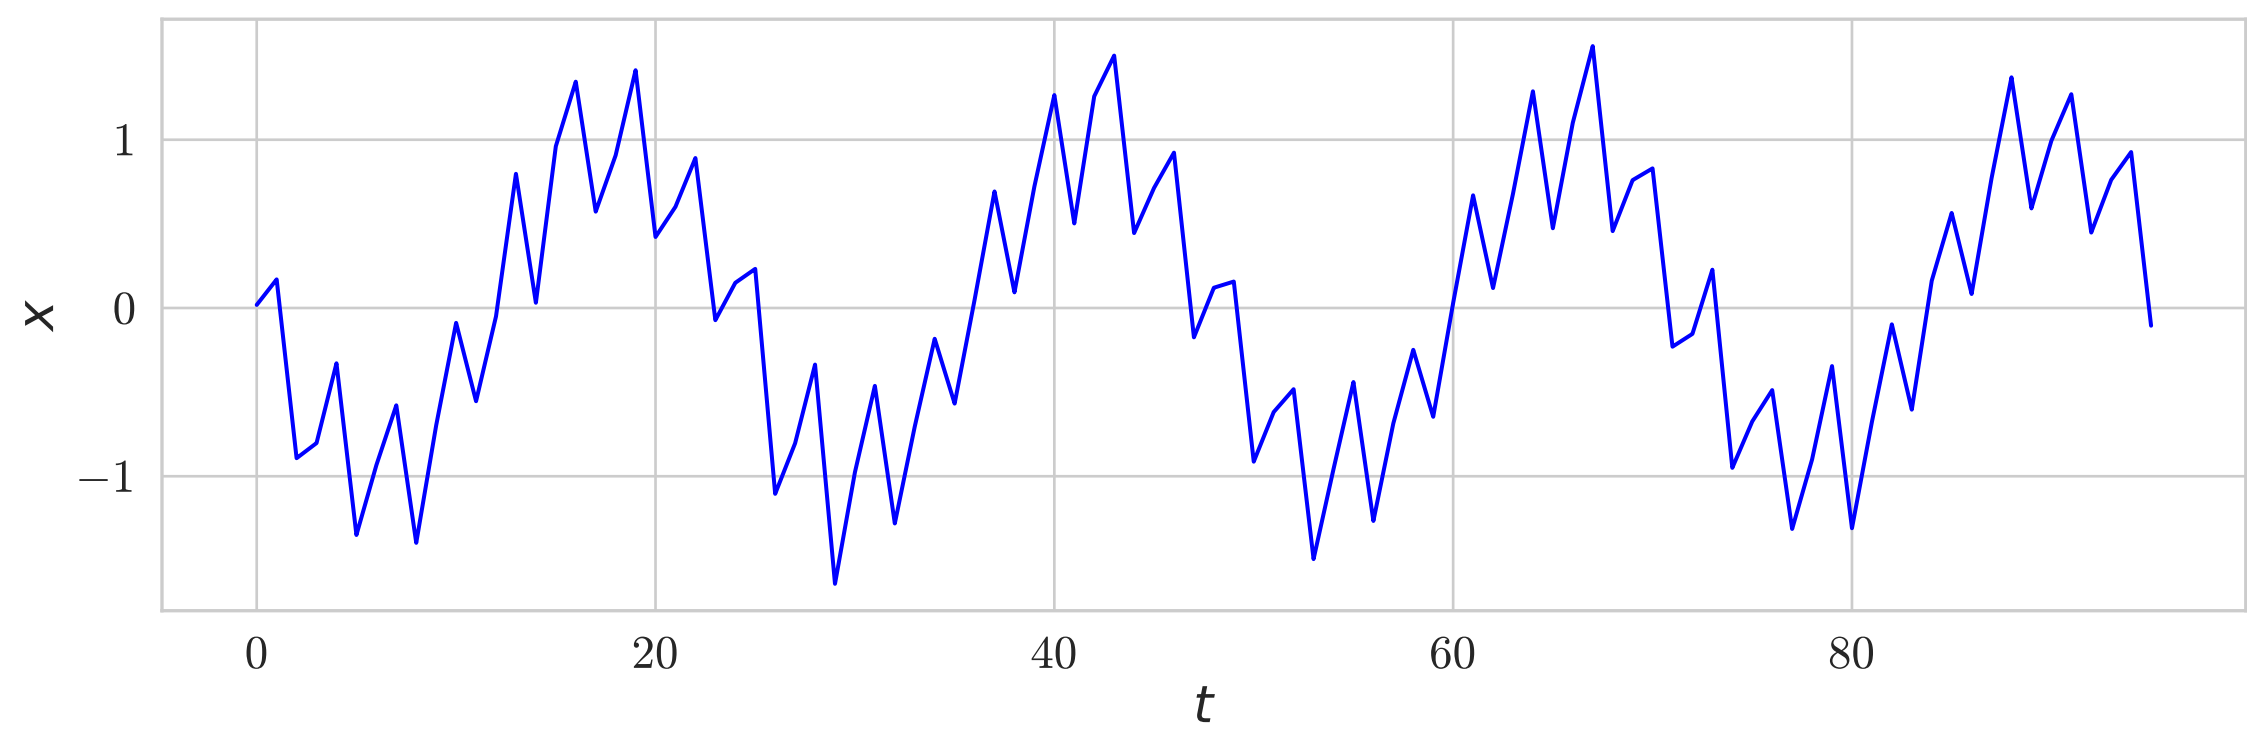

Supplement: supplementary_material [file freq_input.pdf › frequency_shortcut/non_linear/figure/freq_input.pdf]

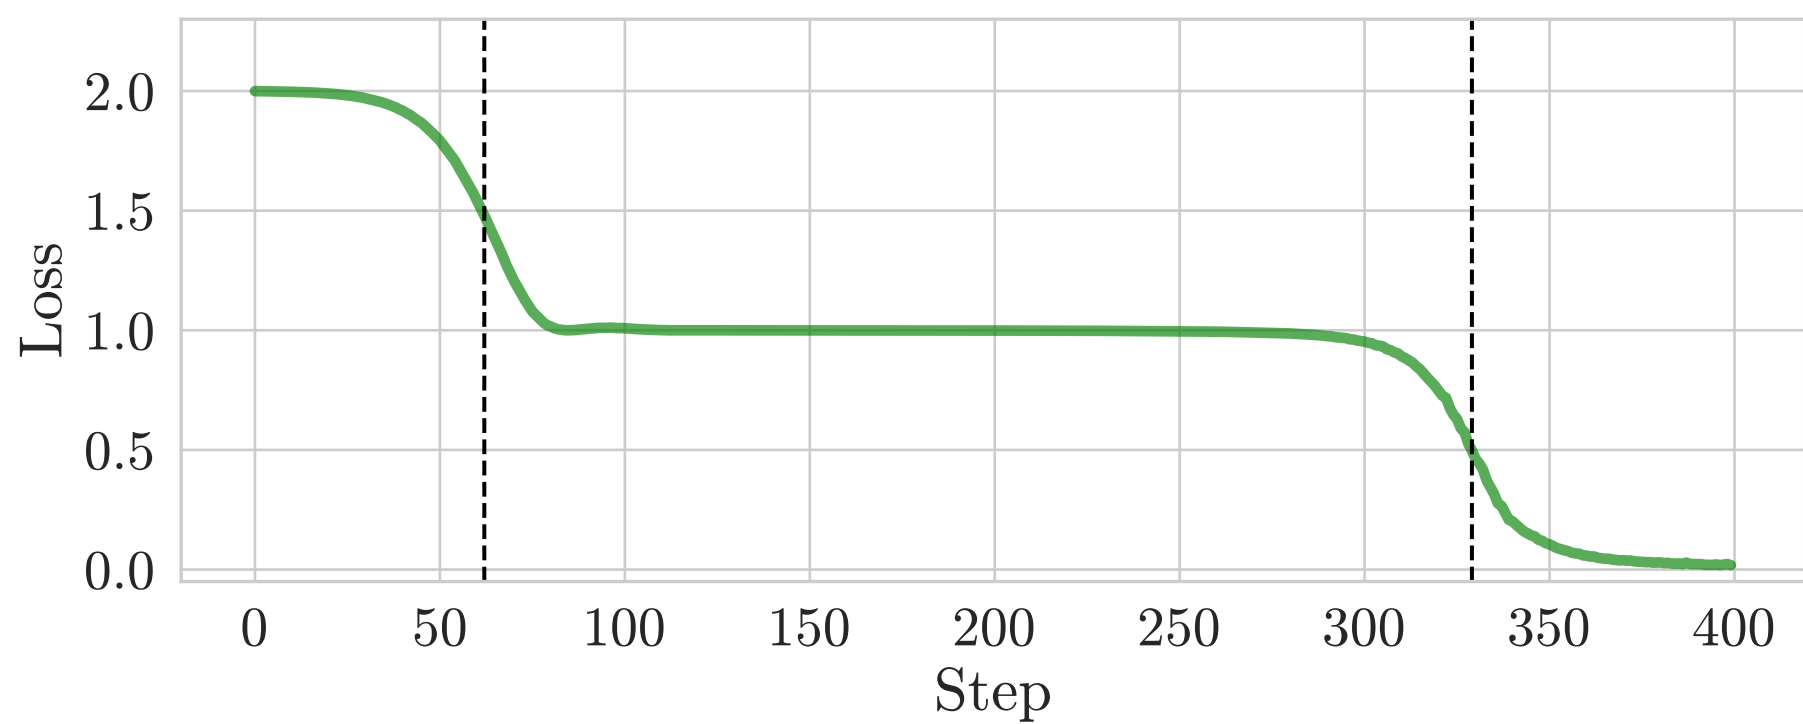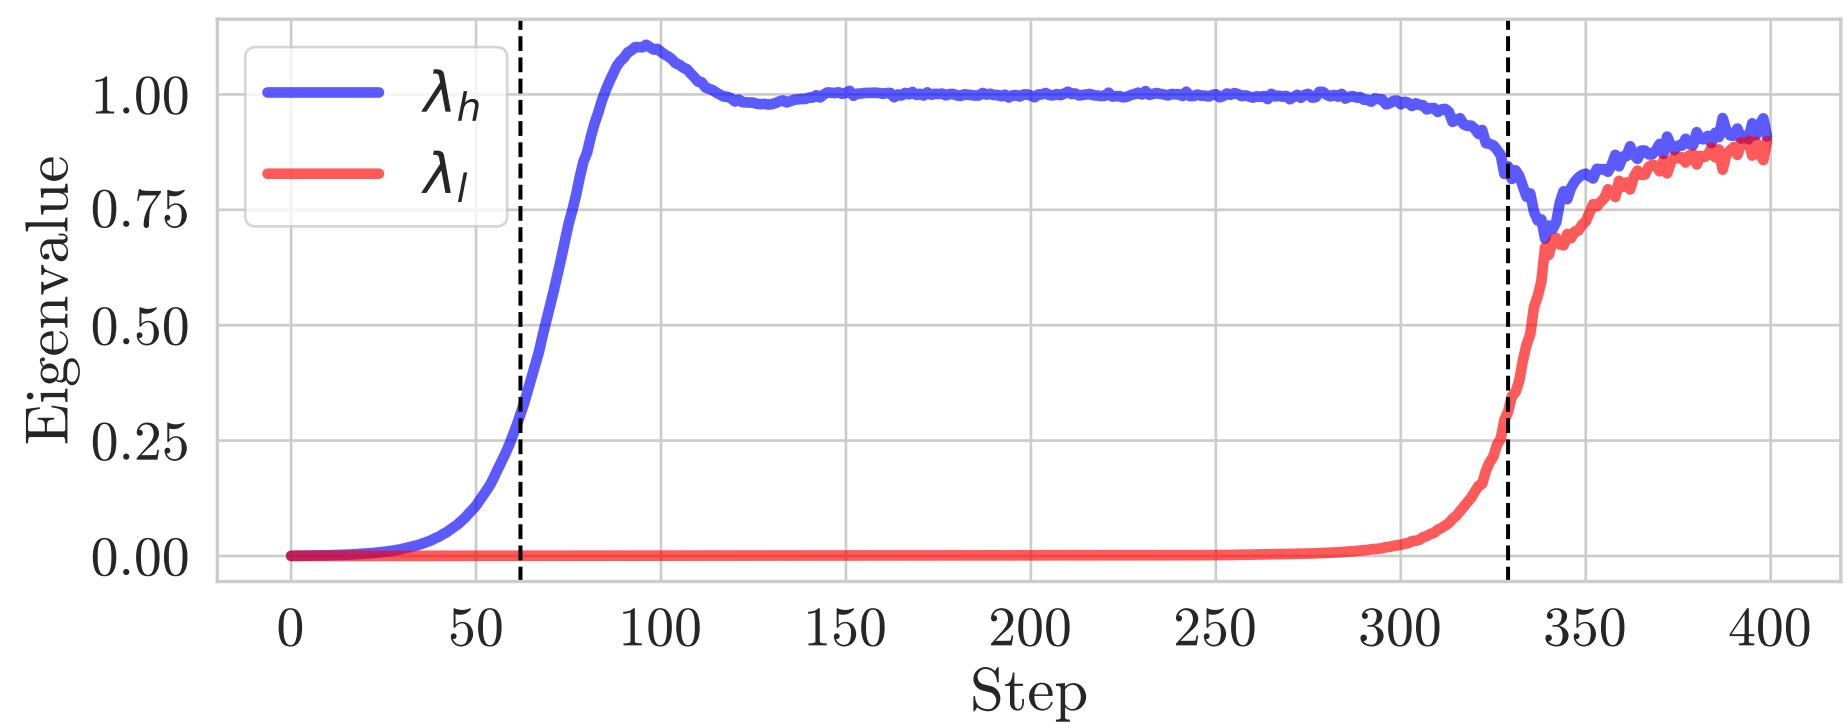

Supplement: supplementary_material [file freq_loss_eig.pdf › frequency_shortcut/non_linear/figure/freq_loss_eig.pdf]

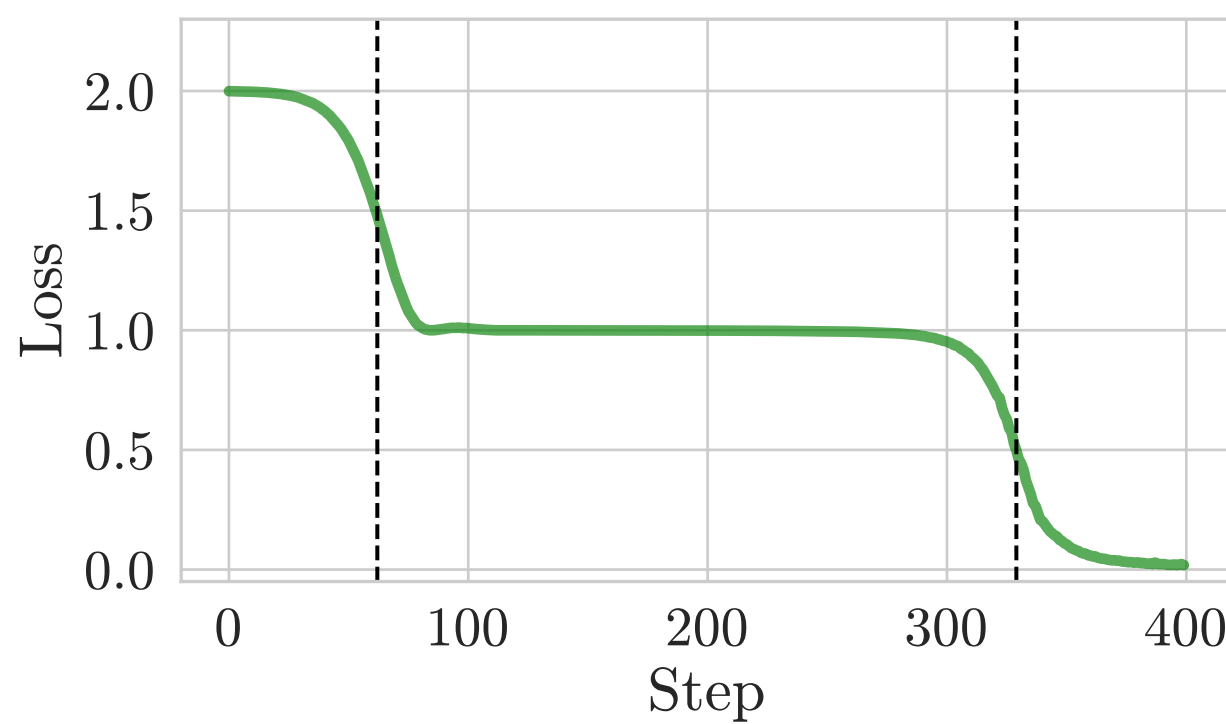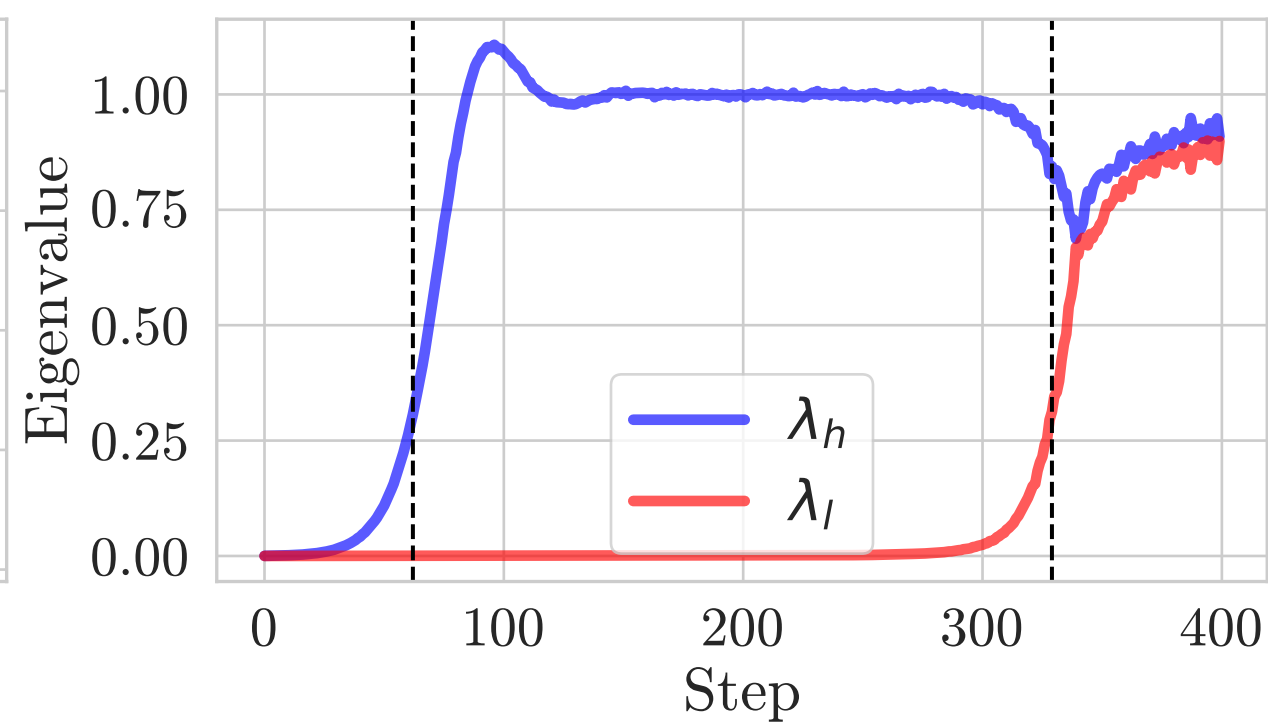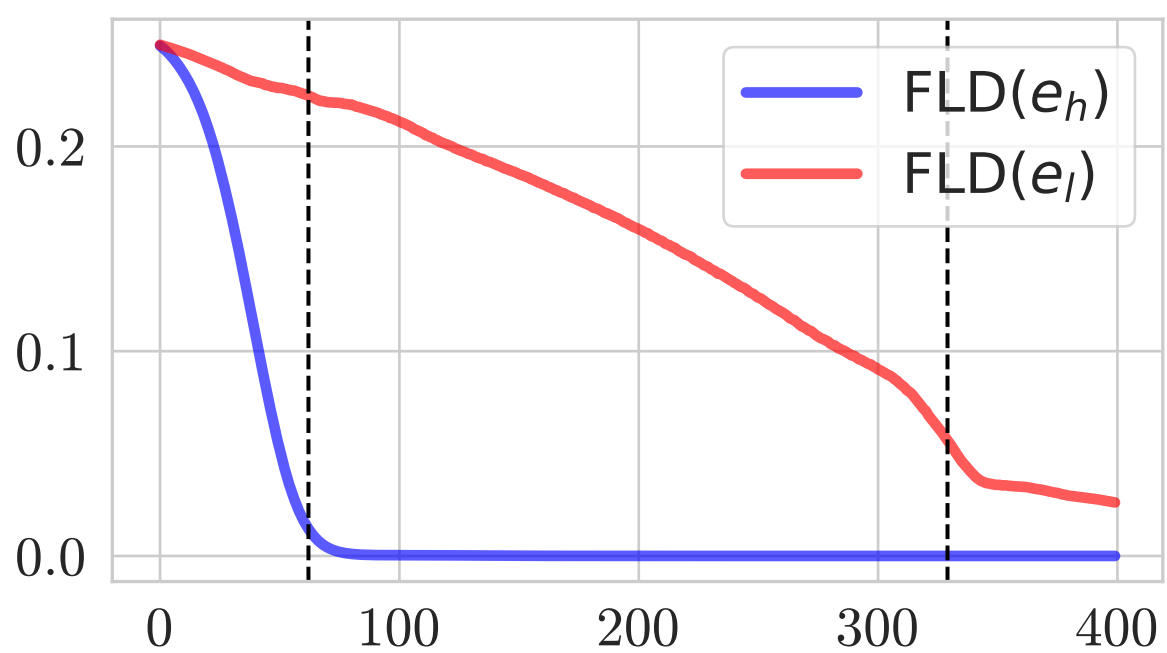

Supplement: supplementary_material [file freq_loss_eig_fld.pdf › frequency_shortcut/non_linear/figure/freq_loss_eig_fld.pdf]
